# Supplementary material for: Survival Implications of the Relationship between Tissue versus Circulating Tumor DNA TP53 Mutations—A Perspective from a Real-World Precision Medicine Cohort
Source: Oxford University Press journal article supplement (doi:10.1158/1535-7163.mct-20-0097), 2020-09-30
Supplement: 15357163mct200097-sup-237119_3_supp_6498675_qf0t38.xlsx [file 15357163mct200097-sup-237119_3_supp_6498675_qf0t38.xlsx]

## Sheet: S.T.1
Supplementary Table 1. Mutation concordance categories. ctDNA – circulating tumor DNA
mutation category	name	number
exactly the same TP53 mutation in tissue DNA and ctDNA	"all same TP53 mutations"	71
different TP53 mutations in tissue DNA and ctDNA	"different TP53 mutations"	27
TP53 mutation/s only in tissue DNA	"only tissue DNA TP53 mutations"	99
TP53 mutation/s only in ctDNA	"only ct DNA TP53 mutations"	43
no TP53 mutatution in both tissue DNA and ctDNA	"no TP53 mutation in both"	175
exactly the same TP53 mutations in tissue DNA and ctDNA + others	"same + other TP53 mutations"	18

## Sheet: S.T.2
Supplementary Table 2. The study's data set
Sample	Cancer type	Sex	Age at diagnosis	Death (yes - 1; no - 0)	OS from diagnosis (months)	OS from ctDNA test (months)	time between tissue biopsy and blood draw (months)	time between tests categorical	TP53 variants in tissue DNA	TP53 variants in ctDNA	%ctDNA	TP53 mutation concordance category	mutations number in tissue DNA	mutations number in ctDNA
1	Hepatopancreatobiliary	Male	50.7	0	23.9	8.3	15.39	>6mos	none	TP53 R248Q	0.4	only ctDNA TP53 mutations	1	1
2	Head & neck cancer	Male	51.4	1	148.4	5.2	1.64	<= 2mos	TP53 D259fs*2, TP53 Y220C	TP53 Y220C	0.2	same + others TP53 mutations	18	1
3	Lung	Female	47.7	1	12.8	0.9	11.71	>6mos	none	none	NA	no TP53 mutation in both	4	1
4	Breast cancer	Female	69.1	0	43.3	39.7	2.83	>2 and <= 6mos	none	none	NA	no TP53 mutation in both	1	1
5	Hepatopancreatobiliary	Male	59.2	1	26.7	2.4	10.13	>6mos	TP53 W146fs*2	TP53 H214R	0.3	different TP53 mutations	5	2
6	Hepatopancreatobiliary	Female	77.4	1	24.9	10	7.14	>6mos	none	none	NA	no TP53 mutation in both	2	2
7	Lung	Female	65.9	0	63.7	20.4	35.63	>6mos	none	none	NA	no TP53 mutation in both	1	1
8	Hepatopancreatobiliary	Male	69	0	84.8	`	56.28	>6mos	TP53 T125M	TP53 T125M	1.8	all same TP53 mutations	4	3
9	Hepatopancreatobiliary	Male	65.7	1	31.2	5.1	26.68	>6mos	TP53 C238S	none	NA	only tissue DNA TP53 mutations	4	1
10	Hepatopancreatobiliary	Male	58.2	0	31.9	3.4	27.24	>6mos	TP53 H179P	TP53 H179P	37.77	all same TP53 mutations	2	5
11	GI, colorectal	Male	55.9	1	3.3	2.4	-0.36	<= 2mos	none	none	NA	no TP53 mutation in both	9	3
12	GI, non-colorectal	Female	58.5	1	55.5	6.5	5.95	>2 and <= 6mos	none	none	NA	no TP53 mutation in both	6	3
13	Lung	Male	70	0	37.1	36.7	0.46	<= 2mos	TP53 V203L	TP53 V203L	2.88	all same TP53 mutations	3	2
14	GI, colorectal	Female	58.2	1	14.6	1	11.55	>6mos	TP53 R342*	TP53 R342*	12	all same TP53 mutations	7	7
15	Brain	Male	51	0	278.8	34.2	241.41	>6mos	TP53 G245S	none	NA	only tissue DNA TP53 mutations	3	1
16	Brain	Male	59.7	1	18.8	10.9	7.76	>6mos	none	none	NA	no TP53 mutation in both	2	1
17	GI, non-colorectal	Male	72.6	1	4.9	4.7	0.23	<= 2mos	TP53 E224*	TP53 E224*	43.05	all same TP53 mutations	4	7
18	Lung	Female	69.3	1	28.7	13.7	-4.54	>2 and <= 6mos	TP53 N288fs*15	TP53 D281V, TP53 P151H	1.9	different TP53 mutations	3	2
19	Lung	Female	36.7	1	32	18.8	9.47	>6mos	TP53 V143M	TP53 V143M	1.3	all same TP53 mutations	4	1
20	Lung	Female	69.8	0	28.8	13.3	12.4	>6mos	none	TP53 R196Q	0.7	only ctDNA TP53 mutations	5	2
21	GI, colorectal	Male	55.8	1	31.1	3.4	11.32	>6mos	TP53 R282W	none	NA	only tissue DNA TP53 mutations	2	13
22	Hepatopancreatobiliary	Female	77	1	38.2	12.4	-10.66	>6mos	TP53 splice site 993+2T>A	TP53 P98A	0.2	different TP53 mutations	3	2
23	Breast cancer	Female	58.2	1	137.6	17.5	15.95	>6mos	none	none	NA	no TP53 mutation in both	2	1
24	GI, colorectal	Male	46.1	1	130.8	14.6	2.86	>2 and <= 6mos	none	none	NA	no TP53 mutation in both	8	4
25	Breast cancer	Female	79.3	1	59.6	1.9	57.96	>6mos	TP53 splice site 993+1G>A	none	NA	only tissue DNA TP53 mutations	9	4
26	Hepatopancreatobiliary	Male	72.2	0	27.7	10.5	0.33	<= 2mos	TP53 R248W	none	NA	only tissue DNA TP53 mutations	4	1
27	Others / unknown primary	Male	33.9	0	354.8	40	37.53	>6mos	none	none	NA	no TP53 mutation in both	1	1
28	Breast cancer	Female	69.6	1	57.6	4.9	0.39	<= 2mos	none	none	NA	no TP53 mutation in both	4	3
29	Brain	Male	68.4	1	44.4	4.8	38.19	>6mos	none	none	NA	no TP53 mutation in both	4	1
30	GI, non-colorectal	Female	55.2	0	210.7	18.2	0.53	<= 2mos	none	none	NA	no TP53 mutation in both	5	2
31	GI, colorectal	Male	44.2	0	126.3	27.5	0.76	<= 2mos	TP53 R248Q	TP53 R248Q	0.6	all same TP53 mutations	4	2
32	Gynecologic	Female	66.3	0	107.3	13.4	62.2	>6mos	none	none	NA	no TP53 mutation in both	2	1
33	GI, non-colorectal	Female	37.7	0	39.3	7.1	31.74	>6mos	none	none	NA	no TP53 mutation in both	2	1
34	Hepatopancreatobiliary	Male	57.9	0	22.9	22	0.92	<= 2mos	TP53 A138V	none	NA	only tissue DNA TP53 mutations	4	1
35	Brain	Female	65.8	0	46.1	35.3	10.63	>6mos	none	none	NA	no TP53 mutation in both	3	1
36	Breast cancer	Female	46	1	386.3	13.5	13.59	>6mos	TP53 H168R	none	NA	only tissue DNA TP53 mutations	11	1
37	GI, non-colorectal	Male	46.2	1	31.7	31	-0.16	<= 2mos	TP53 R342*	TP53 R342*	1.6	all same TP53 mutations	3	3
38	Lung	Female	71.2	0	3.7	3.3	0.36	<= 2mos	TP53 G245V	TP53 R248W	3.9	different TP53 mutations	7	2
39	GI, colorectal	Male	51.4	0	27.1	4.5	20.76	>6mos	none	none	NA	no TP53 mutation in both	2	1
40	Breast cancer	Female	59	0	48.5	43	3.85	>2 and <= 6mos	none	none	NA	no TP53 mutation in both	1	1
41	Lung	Female	79.2	0	88	41.4	1.38	<= 2mos	none	none	NA	no TP53 mutation in both	2	1
42	Brain	Male	44.2	1	25.3	17.6	7.7	>6mos	TP53 R248Q	none	NA	only tissue DNA TP53 mutations	4	1
43	Gynecologic	Female	50.9	1	43.6	1.6	0.66	<= 2mos	TP53 S166*	TP53 S166*, TP53 V147G	18.3	same + others TP53 mutations	3	6
44	Hepatopancreatobiliary	Female	61.6	1	13.1	11.1	1.97	<= 2mos	TP53 D281E	none	NA	only tissue DNA TP53 mutations	3	5
45	Hepatopancreatobiliary	Male	68.1	1	3.7	3.6	0.1	<= 2mos	TP53 R306*	none	NA	only tissue DNA TP53 mutations	4	1
46	Gynecologic	Female	55	1	203	1.8	0.56	<= 2mos	TP53 Y163C	TP53 Y163C	0.5	all same TP53 mutations	4	1
47	Head & neck cancer	Male	75	0	39.7	19.7	19.77	>6mos	none	none	NA	no TP53 mutation in both	10	3
48	GI, non-colorectal	Male	31	1	27.3	5.2	2.04	>2 and <= 6mos	none	none	NA	no TP53 mutation in both	2	1
49	Others / unknown primary	Female	67.3	1	24.5	25.7	-9.05	>6mos	none	TP53 R273H	0.4	only ctDNA TP53 mutations	2	2
50	GI, non-colorectal	Male	28.3	1	10.4	2	2.5	>2 and <= 6mos	TP53 R273C	TP53 R273C	1.68	all same TP53 mutations	4	4
51	Lung	Male	63.4	0	67.7	35.9	6.81	>6mos	TP53 P278L	none	NA	only tissue DNA TP53 mutations	5	1
52	Others / unknown primary	Male	51.9	0	46.2	26.8	0.99	<= 2mos	none	none	NA	no TP53 mutation in both	2	4
53	Others / unknown primary	Male	48.1	1	146.1	21.8	-2.66	>2 and <= 6mos	none	none	NA	no TP53 mutation in both	2	5
54	Gynecologic	Female	40.2	0	271.6	15.8	14.11	>6mos	none	none	NA	no TP53 mutation in both	12	1
55	Lung	Male	61.1	0	78.2	17.6	58.22	>6mos	none	none	NA	no TP53 mutation in both	4	1
56	Gynecologic	Female	47.9	0	354.8	33.1	0.33	<= 2mos	none	TP53 R342*, TP53 C275Y	2.4	only ctDNA TP53 mutations	3	2
57	Brain	Female	66.8	1	55.3	18	36.88	>6mos	TP53 R158H	none	NA	only tissue DNA TP53 mutations	4	1
58	Lung	Female	71.4	1	1.2	0.8	0.43	<= 2mos	TP53 C275F	TP53 C275F	9.9	all same TP53 mutations	5	2
59	Others / unknown primary	Male	11.5	0	205.7	36.5	5	>2 and <= 6mos	none	none	NA	no TP53 mutation in both	2	1
60	GI, non-colorectal	Female	52.2	1	101.2	25.4	-10.76	>6mos	none	none	NA	no TP53 mutation in both	4	1
61	GI, colorectal	Female	64.4	1	20.5	20.2	-3.75	>2 and <= 6mos	none	none	NA	no TP53 mutation in both	1	1
62	Lung	Female	75	0	54.8	26.7	-1.38	<= 2mos	TP53 Q331H, TP53 splice site 994-1G>C	none	NA	only tissue DNA TP53 mutations	5	1
63	Breast cancer	Female	45.8	0	65.8	12.7	51.78	>6mos	TP53 E204*	TP53 C238Y	0.3	different TP53 mutations	3	1
64	Others / unknown primary	Male	60.2	1	24.9	10.6	5.76	>2 and <= 6mos	none	none	NA	no TP53 mutation in both	5	3
65	Brain	Male	2.2	0	318.3	39.7	29.9	>6mos	none	none	NA	no TP53 mutation in both	1	1
66	Gynecologic	Female	71.5	1	65.1	13.4	1.25	<= 2mos	TP53 H179R	TP53 R248Q, TP53 I195T	0.2	different TP53 mutations	5	2
67	Gynecologic	Female	51.7	1	29.9	1.8	27.73	>6mos	TP53 H179R	none	NA	only tissue DNA TP53 mutations	4	1
68	Breast cancer	Female	48.1	0	330.5	33.6	2.53	>2 and <= 6mos	none	TP53 M237I	0.32	only ctDNA TP53 mutations	2	3
69	Breast cancer	Female	52.2	0	180.4	13.4	1.12	<= 2mos	TP53 K132R	none	NA	only tissue DNA TP53 mutations	12	1
70	GI, non-colorectal	Male	67	1	36.9	7.3	-4.97	>2 and <= 6mos	TP53 R273H	TP53 R273H	2.9	all same TP53 mutations	9	3
71	Others / unknown primary	Female	77.1	0	137.8	6.6	0.69	<= 2mos	none	TP53 G244S	0.2	only ctDNA TP53 mutations	3	1
72	Brain	Female	59	0	57	39.5	17.3	>6mos	none	none	NA	no TP53 mutation in both	4	1
73	Others / unknown primary	Female	60.5	0	37.3	0	36.84	>6mos	TP53 S149fs*32	TP53 P177H	0.1	different TP53 mutations	3	1
74	Breast cancer	Female	38.8	1	55.6	18.2	-6.09	>6mos	TP53 truncation exon 10	none	NA	only tissue DNA TP53 mutations	5	1
75	Head & neck cancer	Male	81.4	1	11.3	3.3	6.18	>6mos	TP53 P152fs*14	TP53 S127F, TP53 Y220C, TP53 V173M	0.3	different TP53 mutations	3	3
76	GI, non-colorectal	Male	84.1	1	3	2.7	0.26	<= 2mos	TP53 R282W	none	NA	only tissue DNA TP53 mutations	2	1
77	GI, colorectal	Female	65.1	1	29.3	10.3	8.82	>6mos	TP53 R248W	TP53 R248W	11.49	all same TP53 mutations	5	3
78	Lung	Male	70.2	1	13.3	12.9	0.43	<= 2mos	none	none	NA	no TP53 mutation in both	5	2
79	Others / unknown primary	Male	16.5	0	108.8	36.7	54.61	>6mos	none	none	NA	no TP53 mutation in both	2	1
80	Brain	Male	45.5	0	99	14.5	83.39	>6mos	none	none	NA	no TP53 mutation in both	5	1
81	Breast cancer	Female	62.5	1	79	19.9	28.98	>6mos	TP53 splice site 97-1G>T	none	NA	only tissue DNA TP53 mutations	12	2
82	Others / unknown primary	Male	32.7	1	9.3	6.5	2.11	>2 and <= 6mos	none	none	NA	no TP53 mutation in both	5	1
83	Hepatopancreatobiliary	Male	58.9	0	57.1	11.5	40.03	>6mos	TP53 G245R, TP53 M246V	TP53 V216M	0.3	different TP53 mutations	4	1
84	Lung	Male	35.4	0	50	13.9	11.22	>6mos	none	none	NA	no TP53 mutation in both	2	1
85	Lung	Female	51.8	0	62	42.8	18.32	>6mos	TP53 V272L	none	NA	only tissue DNA TP53 mutations	4	1
86	Brain	Female	67.1	1	42.1	12	29.67	>6mos	TP53 R158H	TP53 Y220C, TP53 P152L	3	different TP53 mutations	7	2
87	Breast cancer	Female	56.5	0	127.2	15.2	2.5	>2 and <= 6mos	none	none	NA	no TP53 mutation in both	5	1
88	GI, non-colorectal	Male	51.6	0	6.9	3	3.85	>2 and <= 6mos	TP53 R248Q	none	NA	only tissue DNA TP53 mutations	2	1
89	Brain	Female	41.6	0	201.7	40	26.61	>6mos	none	none	NA	no TP53 mutation in both	1	1
90	Lung	Male	65.9	1	26.9	1.3	13.82	>6mos	TP53 C275S	TP53 C275S	8.61	all same TP53 mutations	6	6
91	Others / unknown primary	Female	69.2	1	51.6	2.7	0.3	<= 2mos	none	none	NA	no TP53 mutation in both	1	5
92	Breast cancer	Female	55.9	1	42.6	3.2	0.53	<= 2mos	none	TP53 R213Q	0.2	only ctDNA TP53 mutations	10	3
93	Gynecologic	Female	42.9	1	13.2	8.9	0.13	<= 2mos	none	none	NA	no TP53 mutation in both	1	1
94	Lung	Female	72.5	1	78.5	7.6	0.26	<= 2mos	none	none	NA	no TP53 mutation in both	7	1
95	Breast cancer	Female	42.4	0	35.2	12.6	-2.57	>2 and <= 6mos	none	none	NA	no TP53 mutation in both	7	3
96	Others / unknown primary	Male	33.6	0	97.1	37.6	3.72	>2 and <= 6mos	none	none	NA	no TP53 mutation in both	5	1
97	Breast cancer	Female	40.7	1	55.2	32.1	1.81	<= 2mos	TP53 F134V	TP53 F134V	11.2	all same TP53 mutations	7	7
98	Breast cancer	Female	26.8	1	303.3	3.2	17.66	>6mos	none	none	NA	no TP53 mutation in both	2	1
99	Lung	Female	70.7	0	11.7	8	0.79	<= 2mos	TP53 K132R	TP53 K132R	1	all same TP53 mutations	5	1
100	GI, colorectal	Male	76.2	0	26.9	26.6	0.26	<= 2mos	none	none	NA	no TP53 mutation in both	1	1
101	Breast cancer	Female	42.9	0	62.6	8.1	53.75	>6mos	none	none	NA	no TP53 mutation in both	1	1
102	Brain	Female	65.2	0	52.6	33.4	184.77	>6mos	none	none	NA	no TP53 mutation in both	1	1
103	Breast cancer	Female	45.6	1	19.9	1.6	12.2	>6mos	TP53 E286G	TP53 E286G	24.2	all same TP53 mutations	3	2
104	GI, colorectal	Female	34	1	119.9	9.8	0.3	<= 2mos	TP53 R248Q	TP53 R248Q	4.4	all same TP53 mutations	4	3
105	Head & neck cancer	Male	57.7	1	191.8	24	5.07	>2 and <= 6mos	TP53 Q144*	TP53 Q144*	0.9	all same TP53 mutations	7	4
106	GI, non-colorectal	Female	56	0	34.4	34.3	0.1	<= 2mos	none	none	NA	no TP53 mutation in both	2	1
107	GI, non-colorectal	Male	66.6	1	26.3	12.9	0.36	<= 2mos	none	TP53 Y163C	1.62	only ctDNA TP53 mutations	1	1
108	GI, non-colorectal	Male	37.4	0	174.1	3.1	0.66	<= 2mos	none	none	NA	no TP53 mutation in both	6	1
109	Head & neck cancer	Male	71.4	1	48.1	2.3	10.1	>6mos	TP53 R248W	TP53 R248W, TP53 R273H	66.5	same + others TP53 mutations	6	4
110	Hepatopancreatobiliary	Female	70.5	0	22	21.5	-13.19	>6mos	TP53 W91*	none	NA	only tissue DNA TP53 mutations	4	1
111	GI, non-colorectal	Male	63.1	1	48.5	28.2	14.01	>6mos	TP53 R282W	none	NA	only tissue DNA TP53 mutations	14	1
112	Breast cancer	Female	47	0	28.4	2.8	32.2	>6mos	none	none	NA	no TP53 mutation in both	17	2
113	Breast cancer	Female	48.8	0	64.4	39	17.66	>6mos	none	none	NA	no TP53 mutation in both	4	1
114	Others / unknown primary	Male	56.3	0	46.4	32.2	-0.46	<= 2mos	TP53 P278S	none	NA	only tissue DNA TP53 mutations	19	1
115	GI, colorectal	Female	40.7	1	27.1	10	-1.12	<= 2mos	TP53 R282W	TP53 R282W	4.7	all same TP53 mutations	5	2
116	Breast cancer	Female	36.8	0	192.4	12.7	-0.33	<= 2mos	none	TP53 P177H	0.1	only ctDNA TP53 mutations	4	1
117	Breast cancer	Female	52.7	1	191.7	5.4	28.78	>6mos	TP53 R306*	TP53 R306*	1.6	all same TP53 mutations	3	1
118	Lung	Female	68	1	7.4	6.3	1.12	<= 2mos	TP53 S94*	TP53 S94*	0.49	all same TP53 mutations	6	3
119	Lung	Male	50.3	1	7.8	4.2	3.55	>2 and <= 6mos	TP53 V157F	TP53 V157F, TP53 Y220H	4	same + others TP53 mutations	3	3
120	Lung	Female	58.6	1	20.2	1.3	4.11	>2 and <= 6mos	TP53 C135Y	TP53 C135Y	0.8	all same TP53 mutations	8	2
121	Head & neck cancer	Female	26.5	0	415.7	17.4	0.56	<= 2mos	TP53 H179R	none	NA	only tissue DNA TP53 mutations	2	1
122	GI, colorectal	Male	65.6	0	121.4	37.6	-10.36	>6mos	TP53 E349*	TP53 V216M	0.8	different TP53 mutations	6	2
123	Lung	Male	76.1	0	67.3	7	1.09	<= 2mos	TP53 Y220C	TP53 Y220C, TP53 R282W	3.6	same + others TP53 mutations	9	2
124	GI, non-colorectal	Male	81.1	0	48.7	35.8	11.64	>6mos	none	TP53 C275Y	9.81	only ctDNA TP53 mutations	4	2
125	Gynecologic	Female	58.6	0	27.7	0.6	23.29	>6mos	none	TP53 V272M	0.2	only ctDNA TP53 mutations	1	1
126	Lung	Female	71.5	1	39.8	6.1	-0.69	<= 2mos	none	none	NA	no TP53 mutation in both	2	1
127	GI, non-colorectal	Female	61.9	0	38.5	1.6	4.8	>2 and <= 6mos	none	none	NA	no TP53 mutation in both	3	1
128	Brain	Male	69	1	20.3	2.6	17.4	>6mos	none	TP53 L265P	0.81	only ctDNA TP53 mutations	7	1
129	Others / unknown primary	Male	69.5	1	64.4	30.2	12.34	>6mos	none	TP53 Y220C	0.4	only ctDNA TP53 mutations	3	2
130	GI, colorectal	Male	30.5	1	73.5	34.5	34.57	>6mos	TP53 R248W	none	NA	only tissue DNA TP53 mutations	3	1
131	GI, colorectal	Male	57.7	0	170.4	30.4	0.26	<= 2mos	TP53 P390fs*5+, TP53 rearrangement exon 4	none	NA	only tissue DNA TP53 mutations	6	1
132	GI, non-colorectal	Male	80.8	1	23.4	3.1	0.43	<= 2mos	TP53 Q100*	TP53 Q100*, TP53 V173M, TP53 V216M	0.7	same + others TP53 mutations	7	5
133	Brain	Male	59.1	1	162.7	35.3	124.77	>6mos	none	TP53 D281E	4.2	only ctDNA TP53 mutations	4	1
134	Lung	Female	77.2	0	4.1	16.1	0.2	<= 2mos	TP53 splice site 375+1G>T	none	NA	only tissue DNA TP53 mutations	7	1
135	GI, colorectal	Female	72.3	0	40.8	2.6	14.9	>6mos	none	TP53 R249W	1.3	only ctDNA TP53 mutations	2	3
136	GI, colorectal	Male	40.2	0	34.4	33.6	0.76	<= 2mos	TP53 S90fs*33	none	NA	only tissue DNA TP53 mutations	5	1
137	Lung	Female	59.6	0	156.1	11.2	-0.69	<= 2mos	none	none	NA	no TP53 mutation in both	4	1
138	Others / unknown primary	Female	35.6	0	63.1	17.1	-0.66	<= 2mos	none	none	NA	no TP53 mutation in both	1	1
139	Brain	Female	77.1	0	49.2	1.7	48.03	>6mos	TP53 R248W	none	NA	only tissue DNA TP53 mutations	3	1
140	Gynecologic	Female	44.5	0	63.6	36.7	2.01	>2 and <= 6mos	TP53 I255S	TP53 K132E	0.33	different TP53 mutations	2	1
141	Head & neck cancer	Male	68.5	1	124.5	2.1	1.05	<= 2mos	TP53 R282W	TP53 R282W	0.5	all same TP53 mutations	2	1
142	Brain	Male	73.9	1	15.4	2.7	12.57	>6mos	none	none	NA	no TP53 mutation in both	6	1
143	Others / unknown primary	Male	75	1	3	2.2	0.43	<= 2mos	TP53 R267P	TP53 R267P, TP53 R267W	16.8	same + others TP53 mutations	8	7
144	GI, colorectal	Female	42.3	0	52.8	36.2	-14.67	>6mos	TP53 R248Q	TP53 R248Q	1.79	all same TP53 mutations	3	2
145	Brain	Male	84.9	0	32.8	8.8	21.64	>6mos	none	none	NA	no TP53 mutation in both	6	1
146	Breast cancer	Female	43.9	1	43.2	7.9	-5.13	>2 and <= 6mos	none	none	NA	no TP53 mutation in both	4	1
147	GI, non-colorectal	Female	70	0	60.6	11.9	47.14	>6mos	TP53 R158H	none	NA	only tissue DNA TP53 mutations	4	1
148	Breast cancer	Female	28.5	0	281.8	5.8	3.75	>2 and <= 6mos	none	TP53 R175H	19	only ctDNA TP53 mutations	3	8
149	Others / unknown primary	Male	37	1	27.4	11.3	-0.56	<= 2mos	none	none	NA	no TP53 mutation in both	1	1
150	Lung	Female	59.5	1	24.3	3	20.46	>6mos	none	none	NA	no TP53 mutation in both	2	1
151	Gynecologic	Female	58.7	0	51.1	16.3	-0.43	<= 2mos	none	none	NA	no TP53 mutation in both	5	1
152	GI, non-colorectal	Male	59.8	0	91.3	30.4	60.07	>6mos	none	none	NA	no TP53 mutation in both	2	1
153	GI, colorectal	Male	67.6	1	3.8	3	0.82	<= 2mos	TP53 R196fs*52	TP53 Exon 6 Insertion, TP53 L194H	47.2	different TP53 mutations	6	7
154	Lung	Male	85.3	0	14.8	14.5	0.26	<= 2mos	TP53 loss exons 10-11	none	NA	only tissue DNA TP53 mutations	4	1
155	Breast cancer	Female	52.5	0	84.9	10.7	-5.39	>2 and <= 6mos	none	TP53 R175H	0.3	only ctDNA TP53 mutations	5	3
156	Brain	Male	44	1	38.1	12.7	17.53	>6mos	none	none	NA	no TP53 mutation in both	3	1
157	Breast cancer	Female	40	1	78.1	3.8	-2.57	>2 and <= 6mos	none	none	NA	no TP53 mutation in both	6	1
158	Lung	Male	57.3	0	0.9	0.3	0.63	<= 2mos	TP53 E285K	TP53 E285K	2.3	all same TP53 mutations	2	2
159	GI, non-colorectal	Male	35	1	127	3.9	37.24	>6mos	none	none	NA	no TP53 mutation in both	3	1
160	Lung	Male	65.6	1	6.2	4.9	0.89	<= 2mos	none	none	NA	no TP53 mutation in both	1	1
161	GI, colorectal	Female	50.3	1	85.1	2	8.09	>6mos	TP53 Q167*	TP53 Q167*	0.3	all same TP53 mutations	4	2
162	Head & neck cancer	Female	39.4	1	74.7	2	0.69	<= 2mos	TP53 Q104*	TP53 Q104*	0.6	all same TP53 mutations	5	1
163	GI, non-colorectal	Female	52.2	0	98.8	33.9	22.73	>6mos	none	none	NA	no TP53 mutation in both	4	1
164	Brain	Male	25.6	0	98.2	37.8	1.05	<= 2mos	TP53 Y205C	TP53 P190T	0.2	different TP53 mutations	12	1
165	Lung	Female	82.1	0	9.9	9.6	-1.02	<= 2mos	TP53 H179L	none	NA	only tissue DNA TP53 mutations	4	1
166	Brain	Male	47.1	0	50.1	36.9	13.03	>6mos	TP53 I195T, TP53 S215T	none	NA	only tissue DNA TP53 mutations	6	1
167	Breast cancer	Female	52.3	1	61.5	10.6	8.42	>6mos	TP53 splice site 993+2T>C	none	NA	only tissue DNA TP53 mutations	3	1
168	Hepatopancreatobiliary	Male	70.2	1	1.6	1.5	0.13	<= 2mos	none	TP53 E285K, TP53 E221K	0.3	only ctDNA TP53 mutations	3	2
169	Breast cancer	Female	44.3	1	79.9	31.6	-1.61	<= 2mos	TP53 S127Y	none	NA	only tissue DNA TP53 mutations	2	1
170	Others / unknown primary	Male	70.6	1	50.5	3.5	0.39	<= 2mos	none	none	NA	no TP53 mutation in both	1	1
171	Breast cancer	Female	54.4	0	81.2	28.4	1.35	<= 2mos	none	TP53 H178P, TP53 R273C	0.4	only ctDNA TP53 mutations	2	3
172	GI, non-colorectal	Male	66.7	0	78	24.8	52.53	>6mos	none	none	NA	no TP53 mutation in both	2	1
173	GI, non-colorectal	Male	74.1	1	87.8	7	1.94	<= 2mos	TP53 G266E	none	NA	only tissue DNA TP53 mutations	3	1
174	Brain	Female	30.5	1	56.7	6.2	46.18	>6mos	TP53 P278S, TP53 R249T	TP53 Y163C	0.1	different TP53 mutations	4	1
175	Others / unknown primary	Male	65.6	0	60.5	6.6	53.13	>6mos	none	TP53 I254T	0.29	only ctDNA TP53 mutations	5	1
176	Lung	Female	67.5	1	15.1	2.3	12.57	>6mos	none	TP53 R248W, TP53 H179Y	0.3	only ctDNA TP53 mutations	5	2
177	GI, non-colorectal	Female	41.1	1	1.4	1.2	0.16	<= 2mos	TP53 R175H	TP53 R175H	17.1	all same TP53 mutations	4	4
178	Hepatopancreatobiliary	Male	66.6	0	31.6	20.3	11.12	>6mos	none	TP53 I195T	0.4	only ctDNA TP53 mutations	2	1
179	Brain	Male	64.8	0	76.8	0.9	50.2	>6mos	none	none	NA	no TP53 mutation in both	5	1
180	GI, non-colorectal	Male	52.4	1	53.2	3	5.53	>2 and <= 6mos	TP53 G302fs*4	none	NA	only tissue DNA TP53 mutations	5	4
181	Hepatopancreatobiliary	Female	60.7	1	78.5	30.1	0.23	<= 2mos	TP53 W53*	none	NA	only tissue DNA TP53 mutations	7	1
182	Head & neck cancer	Male	73.8	0	59.1	8.9	1.55	<= 2mos	TP53 loss exons 2-4, TP53 V157F	TP53 V157F, TP53 R337C	3.5	same + others TP53 mutations	5	2
183	GI, non-colorectal	Male	67.4	0	73.9	23.3	49.97	>6mos	none	none	NA	no TP53 mutation in both	1	2
184	Hepatopancreatobiliary	Female	62.1	1	39.9	9.9	15.13	>6mos	TP53 R273C	TP53 R273C	1.18	all same TP53 mutations	1	2
185	Lung	Female	67.6	0	49.5	42.5	0.76	<= 2mos	TP53 M246V	none	NA	only tissue DNA TP53 mutations	3	1
186	GI, non-colorectal	Female	56	1	77.2	8.6	42.57	>6mos	none	TP53 F270L	0.3	only ctDNA TP53 mutations	2	1
187	Others / unknown primary	Male	10.1	0	137.2	33.9	46.71	>6mos	none	none	NA	no TP53 mutation in both	1	1
188	GI, colorectal	Male	46.7	1	59.1	7	45.86	>6mos	TP53 G245S	TP53 G245S	6.2	all same TP53 mutations	3	1
189	Brain	Male	65.7	0	45.6	2.1	38.59	>6mos	none	none	NA	no TP53 mutation in both	1	1
190	Lung	Female	76	0	48.7	15.8	-8.78	>6mos	TP53 P250L, TP53 V218fs*29	none	NA	only tissue DNA TP53 mutations	9	1
191	Lung	Female	46.3	0	81.2	20.3	-2.6	>2 and <= 6mos	TP53 splice site 783-2A>G	none	NA	only tissue DNA TP53 mutations	7	1
192	Breast cancer	Female	59	1	125.3	15.8	0.07	<= 2mos	none	none	NA	no TP53 mutation in both	9	8
193	Head & neck cancer	Female	67.1	1	47.1	21.8	3.75	>2 and <= 6mos	TP53 R175H	TP53 R175H, TP53 A161T, TP53 H168R	4.2	same + others TP53 mutations	9	6
194	Others / unknown primary	Female	74.1	0	79.1	38.8	58.62	>6mos	none	TP53 V197M	7.5	only ctDNA TP53 mutations	5	1
195	Lung	Female	86.8	1	4.7	3.9	0.72	<= 2mos	none	none	NA	no TP53 mutation in both	4	2
196	Lung	Male	54.9	0	77.2	11.2	-0.3	<= 2mos	none	none	NA	no TP53 mutation in both	6	3
197	Gynecologic	Female	61.9	1	16.3	4.8	11.38	>6mos	TP53 L204fs*7, TP53 splice site 376-8_376delTCCTACAGT	none	NA	only tissue DNA TP53 mutations	10	1
198	Lung	Female	60.1	1	71.2	34	-4.31	>2 and <= 6mos	none	none	NA	no TP53 mutation in both	1	1
199	Breast cancer	Female	36.7	1	74.3	24.4	13.91	>6mos	none	none	NA	no TP53 mutation in both	5	1
200	Head & neck cancer	Male	53.2	0	26.4	4.4	1.18	<= 2mos	TP53 splice site 75-23_77del26	none	NA	only tissue DNA TP53 mutations	3	1
201	GI, colorectal	Female	71.1	1	20.2	2.2	6.45	>6mos	TP53 R175H	TP53 R175H	9.83	all same TP53 mutations	7	4
202	Lung	Female	82.7	1	5.9	4	1.38	<= 2mos	TP53 splice site 993+1G>A	none	NA	only tissue DNA TP53 mutations	9	1
203	Others / unknown primary	Female	28.4	0	74.7	39.7	34.47	>6mos	none	none	NA	no TP53 mutation in both	5	1
204	Lung	Female	62.7	0	42.5	9.3	-0.26	<= 2mos	none	none	NA	no TP53 mutation in both	4	1
205	GI, non-colorectal	Male	24.6	0	67.1	23.3	-0.1	<= 2mos	TP53 G245S	none	NA	only tissue DNA TP53 mutations	4	1
206	Brain	Male	78	1	7.8	5	2.76	>2 and <= 6mos	none	none	NA	no TP53 mutation in both	5	1
207	Head & neck cancer	Male	14.6	0	476.6	22.7	23.45	>6mos	none	none	NA	no TP53 mutation in both	1	1
208	Brain	Female	69.9	0	66.6	27.6	38.39	>6mos	none	none	NA	no TP53 mutation in both	4	1
209	GI, colorectal	Female	57.4	1	52.4	14.7	2.99	>2 and <= 6mos	TP53 E285K	TP53 E285K	1.5	all same TP53 mutations	3	2
210	Breast cancer	Female	58.5	0	184.4	17.1	53.09	>6mos	TP53 R273L	none	NA	only tissue DNA TP53 mutations	3	1
211	Others / unknown primary	Male	54.5	1	46.4	16.2	15.16	>6mos	none	none	NA	no TP53 mutation in both	3	1
212	Hepatopancreatobiliary	Male	61.7	1	16.1	7.3	1.12	<= 2mos	none	none	NA	no TP53 mutation in both	4	1
213	Hepatopancreatobiliary	Male	65.3	1	59.3	25	32.24	>6mos	none	none	NA	no TP53 mutation in both	2	1
214	Lung	Male	64.8	0	102.7	25.9	-1.64	<= 2mos	TP53 R280S	none	NA	only tissue DNA TP53 mutations	5	1
215	Breast cancer	Female	40.8	1	89.6	10.2	3.19	>2 and <= 6mos	none	none	NA	no TP53 mutation in both	10	2
216	Breast cancer	Female	38.2	1	27.1	3.1	8.95	>6mos	TP53 Y126C	TP53 Y126C, TP53 H178P	3.9	same + others TP53 mutations	10	2
217	Others / unknown primary	Male	54.6	0	71.8	27	14.74	>6mos	none	none	NA	no TP53 mutation in both	2	1
218	Lung	Female	81.3	1	343.2	7.5	25.53	>6mos	none	none	NA	no TP53 mutation in both	3	2
219	GI, non-colorectal	Female	52.9	1	32.2	1.2	30.63	>6mos	TP53 R248Q	TP53 R248Q	16.54	all same TP53 mutations	8	4
220	Brain	Male	34	1	58.3	28.3	29.38	>6mos	TP53 D281E	none	NA	only tissue DNA TP53 mutations	3	1
221	Head & neck cancer	Male	56.7	0	59.9	10.2	5.03	>2 and <= 6mos	TP53 K305fs*40	none	NA	only tissue DNA TP53 mutations	3	1
222	Brain	Male	55.2	1	30.8	1.8	28.59	>6mos	none	none	NA	no TP53 mutation in both	6	1
223	Head & neck cancer	Male	54.2	1	5	4.5	44.54	>6mos	TP53 I255del	none	NA	only tissue DNA TP53 mutations	7	1
224	Others / unknown primary	Male	65.7	0	43.4	42.5	-2.07	>2 and <= 6mos	none	none	NA	no TP53 mutation in both	1	1
225	GI, colorectal	Female	56.8	0	116.2	0.8	13.06	>6mos	TP53 V272G	TP53 V272G	1.7	all same TP53 mutations	1	2
226	Breast cancer	Female	53.2	1	106	18	24.31	>6mos	none	none	NA	no TP53 mutation in both	7	6
227	Breast cancer	Female	57.8	1	38.6	6.7	24.57	>6mos	TP53 R213*	TP53 R213*	5.1	all same TP53 mutations	3	1
228	Others / unknown primary	Female	62.7	0	61.3	1.9	44.8	>6mos	none	none	NA	no TP53 mutation in both	2	2
229	Brain	Male	37.6	0	65.8	39.5	25.95	>6mos	TP53 D207fs*6	none	NA	only tissue DNA TP53 mutations	3	1
230	Lung	Female	60.7	0	65.9	5.9	58.68	>6mos	none	none	NA	no TP53 mutation in both	4	1
231	Brain	Male	48.7	0	41.5	16.9	24.18	>6mos	none	none	NA	no TP53 mutation in both	4	1
232	GI, colorectal	Male	69	1	10	7.5	1.68	<= 2mos	TP53 splice site 376-1G>C	none	NA	only tissue DNA TP53 mutations	9	1
233	GI, colorectal	Female	67.3	0	72.6	28.8	-0.33	<= 2mos	TP53 G245S	TP53 G245S	0.3	all same TP53 mutations	10	1
234	Others / unknown primary	Female	51.9	0	66.6	11.9	15.59	>6mos	none	none	NA	no TP53 mutation in both	1	1
235	Brain	Male	45.3	0	125.1	39.7	23.13	>6mos	TP53 P142fs*28, TP53 S241A	TP53 V143M	0.4	different TP53 mutations	4	1
236	Gynecologic	Female	60.7	0	45.4	21.1	19.28	>6mos	TP53 R273H	TP53 Y236D	0.2	different TP53 mutations	7	2
237	GI, non-colorectal	Male	52.3	0	77	0.5	0.72	<= 2mos	TP53 G266R	TP53 G266R	51.7	all same TP53 mutations	5	4
238	Gynecologic	Female	59.2	1	54.3	32.2	-6.88	>6mos	TP53 splice site 993+1G>A	none	NA	only tissue DNA TP53 mutations	9	1
239	Others / unknown primary	Male	52.6	0	30.4	1.7	1.18	<= 2mos	none	none	NA	no TP53 mutation in both	1	1
240	GI, colorectal	Female	51.7	1	49.5	2.9	1.64	<= 2mos	TP53 Y163C	TP53 Y163C, TP53 Q317K	75	same + others TP53 mutations	6	5
241	Brain	Male	44.1	0	151.9	35.5	16.35	>6mos	TP53 S241T	none	NA	only tissue DNA TP53 mutations	4	1
242	Lung	Male	67.9	1	35.5	14.4	20.16	>6mos	none	TP53 S241F	0.9	only ctDNA TP53 mutations	2	1
243	Gynecologic	Female	67.4	0	45.9	4.7	40.69	>6mos	none	none	NA	no TP53 mutation in both	15	1
244	Lung	Female	44.1	1	33.8	14.9	-0.66	<= 2mos	TP53 H168R	TP53 H168R	3	all same TP53 mutations	3	5
245	Breast cancer	Female	55.7	0	250.1	23.6	1.61	<= 2mos	TP53 C242G	TP53 C242G	2	all same TP53 mutations	12	1
246	Lung	Male	54.6	1	56.4	17.2	-0.76	<= 2mos	TP53 R282W	none	NA	only tissue DNA TP53 mutations	5	2
247	Lung	Male	73.9	1	34.1	6.8	-0.72	<= 2mos	TP53 C238_N239>*VGSDCTTIHYNYMC	none	NA	only tissue DNA TP53 mutations	9	4
248	Lung	Male	77.8	0	43.8	42.5	1.28	<= 2mos	TP53 G266E	TP53 G266E	0.3	all same TP53 mutations	2	1
249	Others / unknown primary	Female	63.4	1	10.1	9.6	0.49	<= 2mos	none	none	NA	no TP53 mutation in both	1	1
250	Brain	Female	50.4	0	30.8	12.5	18.06	>6mos	none	none	NA	no TP53 mutation in both	3	1
251	Lung	Female	67.5	1	30.5	17.3	3.32	>2 and <= 6mos	TP53 E258K	TP53 E258K	2.4	all same TP53 mutations	9	2
252	Hepatopancreatobiliary	Male	64.1	0	24.8	2.5	22.07	>6mos	none	none	NA	no TP53 mutation in both	5	1
253	GI, colorectal	Female	42.3	0	43.8	14.2	9.9	>6mos	TP53 R282W	none	NA	only tissue DNA TP53 mutations	4	1
254	GI, non-colorectal	Female	40.3	0	55.8	33.6	21.91	>6mos	TP53 V272L	TP53 V272L	0.95	all same TP53 mutations	2	2
255	Head & neck cancer	Male	52.8	1	48.5	12.1	35.89	>6mos	TP53 R209fs*6	none	NA	only tissue DNA TP53 mutations	3	1
256	Brain	Male	53.6	0	135.7	39.7	15.86	>6mos	none	none	NA	no TP53 mutation in both	4	1
257	Head & neck cancer	Female	76.3	1	41.3	16.8	4.61	>2 and <= 6mos	none	TP53 P190S	0.2	only ctDNA TP53 mutations	2	1
258	Breast cancer	Female	36.4	1	94.3	11.9	11.94	>6mos	none	none	NA	no TP53 mutation in both	12	2
259	GI, colorectal	Male	72.6	0	50.4	8.3	28.19	>6mos	TP53 R181C	TP53 R181C	0.4	all same TP53 mutations	7	4
260	Others / unknown primary	Male	62.7	0	56.2	7.1	31.45	>6mos	TP53 H179R, TP53 R196*	none	NA	only tissue DNA TP53 mutations	11	1
261	GI, non-colorectal	Female	41.3	1	34.4	15	0.43	<= 2mos	none	none	NA	no TP53 mutation in both	4	2
262	GI, non-colorectal	Male	60.3	0	56.7	25.5	0.16	<= 2mos	TP53 I254del	none	NA	only tissue DNA TP53 mutations	3	1
263	GI, non-colorectal	Male	44.4	1	30.4	10.3	19.87	>6mos	TP53 splice site 96+1G>A	none	NA	only tissue DNA TP53 mutations	1	1
264	Hepatopancreatobiliary	Female	22	1	29.8	13.8	15.86	>6mos	none	none	NA	no TP53 mutation in both	2	1
265	Hepatopancreatobiliary	Female	70.7	0	49.6	3.7	44.21	>6mos	TP53 splice site 920-2A>G	none	NA	only tissue DNA TP53 mutations	4	1
266	Others / unknown primary	Male	71.5	1	88.8	13.3	3.13	>2 and <= 6mos	TP53 R282W	none	NA	only tissue DNA TP53 mutations	8	1
267	Hepatopancreatobiliary	Male	63	0	29.7	33.9	29.01	>6mos	none	none	NA	no TP53 mutation in both	2	1
268	Hepatopancreatobiliary	Male	60.2	1	10.2	9.3	0.92	<= 2mos	none	none	NA	no TP53 mutation in both	3	1
269	Breast cancer	Female	61.5	1	46.3	16.8	-0.49	<= 2mos	TP53 R213L	TP53 R213L	3.3	all same TP53 mutations	4	2
270	Hepatopancreatobiliary	Male	61.1	1	22.5	8.2	14.18	>6mos	none	none	NA	no TP53 mutation in both	2	1
271	Others / unknown primary	Male	67.5	0	94	21.4	14.8	>6mos	none	none	NA	no TP53 mutation in both	6	1
272	Brain	Male	70.3	0	50	38.8	11.02	>6mos	none	TP53 Y234C	0.7	only ctDNA TP53 mutations	2	1
273	Lung	Female	64.3	0	69.5	20.7	-0.92	<= 2mos	TP53 F134C	TP53 F134C	12.9	all same TP53 mutations	4	2
274	Brain	Male	48.4	0	13	2.3	10.59	>6mos	none	none	NA	no TP53 mutation in both	6	1
275	Brain	Female	58.5	1	105.5	29.6	74.9	>6mos	TP53 R273C	none	NA	only tissue DNA TP53 mutations	5	1
276	GI, colorectal	Male	47.2	1	42.3	8.9	-6.84	>6mos	TP53 G245S	TP53 G245S	29.9	all same TP53 mutations	8	10
277	GI, colorectal	Female	48.3	1	44.9	31.6	-5.07	>2 and <= 6mos	TP53 V173M	TP53 V173M	0.26	all same TP53 mutations	8	1
278	Brain	Male	51.4	1	20.3	11.4	8.75	>6mos	none	none	NA	no TP53 mutation in both	1	1
279	Others / unknown primary	Male	55.8	0	175.6	17.3	4.41	>2 and <= 6mos	none	none	NA	no TP53 mutation in both	1	1
280	Breast cancer	Female	41.8	1	104.8	14.6	0.66	<= 2mos	none	none	NA	no TP53 mutation in both	7	1
281	Lung	Female	53.4	0	26.1	25.6	-0.46	<= 2mos	none	none	NA	no TP53 mutation in both	5	1
282	Lung	Female	66.7	1	23.1	1.2	21.55	>6mos	none	none	NA	no TP53 mutation in both	4	5
283	Lung	Male	65.3	0	58.9	27.1	3.42	>2 and <= 6mos	TP53 S241F	none	NA	only tissue DNA TP53 mutations	10	1
284	Lung	Female	81.3	0	88	23.1	-5.99	>2 and <= 6mos	none	none	NA	no TP53 mutation in both	4	1
285	GI, colorectal	Male	61	1	18	6.4	5.13	>2 and <= 6mos	TP53 M246V	TP53 M246V	1.7	all same TP53 mutations	6	4
286	GI, colorectal	Male	43.9	1	15.5	4.5	-2.24	>2 and <= 6mos	TP53 P278T	TP53 P278T	0.35	all same TP53 mutations	7	2
287	Brain	Female	39	0	86.1	39.7	45.86	>6mos	TP53 R175H	none	NA	only tissue DNA TP53 mutations	3	1
288	Lung	Female	65.2	0	160	37.4	6.64	>6mos	none	TP53 Y205C	0.1	only ctDNA TP53 mutations	8	1
289	Breast cancer	Female	41.2	1	146.9	17	26.68	>6mos	none	none	NA	no TP53 mutation in both	2	1
290	GI, colorectal	Male	51.6	0	11.5	1.9	0.43	<= 2mos	TP53 S46fs*74	none	NA	only tissue DNA TP53 mutations	2	3
291	GI, colorectal	Female	48.1	1	29.2	20.5	5.03	>2 and <= 6mos	TP53 G245R	none	NA	only tissue DNA TP53 mutations	8	1
292	GI, non-colorectal	Female	57.9	1	54.5	10.4	-1.81	<= 2mos	none	none	NA	no TP53 mutation in both	3	1
293	Hepatopancreatobiliary	Female	64.5	1	11	2.5	8.32	>6mos	TP53 V172F	TP53 V172F	62.52	all same TP53 mutations	3	5
294	Brain	Male	45.8	1	18.3	12.6	5.63	>2 and <= 6mos	none	none	NA	no TP53 mutation in both	8	1
295	GI, colorectal	Female	37.9	0	54.2	24.1	1.32	<= 2mos	TP53 P190fs*57, TP53 P190L, TP53 P191S	none	NA	only tissue DNA TP53 mutations	7	1
296	Brain	Male	63.2	1	11.7	5.8	5.49	>2 and <= 6mos	TP53 E286K, TP53 T125M	none	NA	only tissue DNA TP53 mutations	8	1
297	GI, colorectal	Male	29.4	1	5	0.5	0.72	<= 2mos	TP53 Y205H	none	NA	only tissue DNA TP53 mutations	3	1
298	Breast cancer	Female	41.2	1	9.1	9.4	-0.3	<= 2mos	TP53 H179Q	TP53 H179Q	52.2	all same TP53 mutations	4	4
299	GI, colorectal	Female	32	0	43.8	37.1	-1.78	<= 2mos	none	none	NA	no TP53 mutation in both	4	1
300	Lung	Female	70.6	1	2.6	0.8	0.69	<= 2mos	TP53 Y205C	TP53 Y205C	6.9	all same TP53 mutations	5	3
301	Breast cancer	Female	41.2	1	65.7	18.7	-3.06	>2 and <= 6mos	TP53 Y107*	TP53 Y107*	2.89	all same TP53 mutations	4	1
302	Lung	Female	54.4	0	73.1	37.4	-3.09	>2 and <= 6mos	TP53 G244A	none	NA	only tissue DNA TP53 mutations	6	1
303	Brain	Female	37.4	0	21.3	17.8	3.49	>2 and <= 6mos	TP53 C238Y, TP53 E287fs*58	none	NA	only tissue DNA TP53 mutations	8	1
304	Lung	Female	62.2	0	42.2	42.1	0.16	<= 2mos	TP53 splice site 920-6_922delTCCTAGCAC	none	NA	only tissue DNA TP53 mutations	6	3
305	GI, colorectal	Male	62.7	1	16.4	2.9	13.39	>6mos	none	TP53 M237T, TP53 L257R, TP53 G245C, TP53 K139N, TP53 V216M, TP53 R273C	3	only ctDNA TP53 mutations	11	13
306	Hepatopancreatobiliary	Female	60.2	1	13	10.6	0.39	<= 2mos	TP53 R213*	TP53 R213*	0.6	all same TP53 mutations	5	1
307	Others / unknown primary	Female	55	1	64.2	5.7	1.61	<= 2mos	TP53 splice site 993+1G>A	TP53 V172F	0.7	different TP53 mutations	3	4
308	Brain	Female	41.1	1	20	5.6	14.18	>6mos	TP53 R158H	none	NA	only tissue DNA TP53 mutations	5	1
309	Brain	Female	55.4	0	41.6	39.7	1.88	<= 2mos	none	none	NA	no TP53 mutation in both	2	1
310	GI, colorectal	Female	34.7	1	39.4	19.5	0.95	<= 2mos	TP53 M237I	none	NA	only tissue DNA TP53 mutations	3	1
311	Gynecologic	Female	60.8	1	81.8	6.7	8.45	>6mos	none	TP53 V173L, TP53 Splice Site SNV	0.1	only ctDNA TP53 mutations	6	8
312	Brain	Female	29.4	0	36.9	22	14.64	>6mos	TP53 C242F, TP53 R175H	none	NA	only tissue DNA TP53 mutations	4	1
313	GI, non-colorectal	Male	41.7	0	47.7	36.5	11.05	>6mos	none	none	NA	no TP53 mutation in both	1	1
314	GI, colorectal	Female	63.5	1	40.7	8.7	6.51	>6mos	TP53 Y205D	none	NA	only tissue DNA TP53 mutations	6	1
315	Hepatopancreatobiliary	Male	61.6	1	34.9	34.5	0.36	<= 2mos	none	none	NA	no TP53 mutation in both	3	1
316	Lung	Female	48.4	0	14.2	12.2	1.97	<= 2mos	none	none	NA	no TP53 mutation in both	3	1
317	Others / unknown primary	Female	62.3	1	21.2	18.2	0.33	<= 2mos	none	none	NA	no TP53 mutation in both	6	1
318	Brain	Male	77.2	1	24.6	23.7	0.86	<= 2mos	none	none	NA	no TP53 mutation in both	5	1
319	Breast cancer	Female	40.1	1	74.1	2.9	37.47	>6mos	TP53 V216M	TP53 V216M	40	all same TP53 mutations	5	2
320	Brain	Female	61.8	0	3.5	1.2	2.3	>2 and <= 6mos	none	none	NA	no TP53 mutation in both	4	1
321	GI, non-colorectal	Male	29.1	0	40.5	36.2	4.21	>2 and <= 6mos	TP53 W53*	none	NA	only tissue DNA TP53 mutations	2	1
322	Brain	Female	37.5	0	160	15.7	26.94	>6mos	none	none	NA	no TP53 mutation in both	1	1
323	Hepatopancreatobiliary	Male	60.9	1	23.5	24.3	-0.76	<= 2mos	none	none	NA	no TP53 mutation in both	4	1
324	GI, colorectal	Male	62.5	1	19.5	9.5	9.9	>6mos	TP53 P152fs*18, TP53 R158H	TP53 R158H	11.8	same + others TP53 mutations	7	2
325	Others / unknown primary	Female	54.4	1	18.2	1.6	14.64	>6mos	none	none	NA	no TP53 mutation in both	10	10
326	GI, colorectal	Female	41.3	0	9.5	3.2	0.49	<= 2mos	TP53 M237I	none	NA	only tissue DNA TP53 mutations	8	1
327	GI, colorectal	Female	49	0	45.4	31.8	0.66	<= 2mos	TP53 R282W	TP53 M246V, TP53 R282W	2	same + others TP53 mutations	5	2
328	Breast cancer	Female	49.2	1	87.1	6	77.66	>6mos	none	none	NA	no TP53 mutation in both	5	1
329	GI, colorectal	Male	65.3	0	76.7	10.4	26.48	>6mos	TP53 P152L	TP53 P152L	0.2	all same TP53 mutations	2	2
330	Brain	Female	35.9	1	15.3	6.6	1.58	<= 2mos	none	none	NA	no TP53 mutation in both	1	1
331	Hepatopancreatobiliary	Female	58.5	1	24.9	24.2	5.07	>2 and <= 6mos	TP53 splice site 919+1G>A	none	NA	only tissue DNA TP53 mutations	4	1
332	Lung	Male	75.6	1	5.4	2.5	1.51	<= 2mos	none	none	NA	no TP53 mutation in both	4	1
333	Others / unknown primary	Male	71.2	1	28.4	22.2	0.2	<= 2mos	none	none	NA	no TP53 mutation in both	5	1
334	Breast cancer	Female	52	1	115	6.4	12.89	>6mos	none	TP53 H168P, TP53 S127F	0.3	only ctDNA TP53 mutations	3	4
335	Others / unknown primary	Male	45.2	1	2.8	0.6	1.71	<= 2mos	TP53 H168R	TP53 H168R	9.9	all same TP53 mutations	5	1
336	Hepatopancreatobiliary	Male	60	0	10.9	8.9	0.69	<= 2mos	none	none	NA	no TP53 mutation in both	3	1
337	Lung	Male	74.4	1	1.6	2.6	0.56	<= 2mos	TP53 E271V, TP53 V274D	TP53 C176F, TP53 V274D, TP53 R175C, TP53 E271V	3.8	same + others TP53 mutations	18	5
338	Hepatopancreatobiliary	Female	38.4	0	25.2	12.2	12.89	>6mos	none	none	NA	no TP53 mutation in both	1	1
339	Breast cancer	Female	32.6	1	130.2	21.7	8.68	>6mos	none	none	NA	no TP53 mutation in both	3	5
340	Brain	Male	60.3	1	6.4	5.3	0.63	<= 2mos	none	none	NA	no TP53 mutation in both	7	1
341	Lung	Female	66.3	0	63.7	5.1	-0.66	<= 2mos	TP53 E298*	TP53 E298*	13.16	all same TP53 mutations	4	7
342	Hepatopancreatobiliary	Male	62.8	1	2.3	2	0.23	<= 2mos	TP53 T140fs*28	none	NA	only tissue DNA TP53 mutations	6	1
343	GI, non-colorectal	Female	46.5	1	51.6	7.5	23.36	>6mos	none	none	NA	no TP53 mutation in both	3	1
344	Brain	Female	59.9	0	68.7	31	37.17	>6mos	none	none	NA	no TP53 mutation in both	1	1
345	Head & neck cancer	Male	64.1	0	77.6	0.2	10.36	>6mos	none	none	NA	no TP53 mutation in both	1	1
346	Lung	Female	67.9	0	39.4	8.4	30.23	>6mos	none	none	NA	no TP53 mutation in both	5	1
347	GI, colorectal	Male	45.1	1	70.8	33.5	0.43	<= 2mos	TP53 S127F	TP53 S127F	39	all same TP53 mutations	6	5
348	GI, colorectal	Female	50.4	0	40.6	35.5	1.51	<= 2mos	none	none	NA	no TP53 mutation in both	3	1
349	Hepatopancreatobiliary	Female	59.1	1	9.4	9	0.39	<= 2mos	TP53 P223fs*24	TP53 P223L	0.56	different TP53 mutations	3	3
350	Lung	Female	66.4	1	27.4	15.7	0.46	<= 2mos	TP53 F134L	TP53 F134L	30.6	all same TP53 mutations	11	6
351	Lung	Male	68.2	0	36.2	35.2	-0.49	<= 2mos	none	none	NA	no TP53 mutation in both	3	1
352	Brain	Male	57.8	0	11.1	10.6	0.46	<= 2mos	none	none	NA	no TP53 mutation in both	6	1
353	Brain	Female	60.7	0	36.1	34.1	1.91	<= 2mos	TP53 R273C – subclonal	none	NA	only tissue DNA TP53 mutations	6	1
354	Brain	Male	22.5	0	35.3	34.8	0.56	<= 2mos	TP53 G245S	none	NA	only tissue DNA TP53 mutations	3	1
355	Lung	Female	75.5	0	26.8	21.1	4.47	>2 and <= 6mos	TP53 R65*	none	NA	only tissue DNA TP53 mutations	3	1
356	Brain	Female	39.9	1	19.4	4.5	14.7	>6mos	none	TP53 S215R	2.34	only ctDNA TP53 mutations	5	1
357	Others / unknown primary	Female	28.1	1	3	1.9	1.02	<= 2mos	none	TP53 E171K	0.1	only ctDNA TP53 mutations	7	4
358	Head & neck cancer	Female	82.5	1	57.6	8.1	10.89	>6mos	none	none	NA	no TP53 mutation in both	10	1
359	Breast cancer	Female	75.6	0	18.1	1.8	51.91	>6mos	TP53 splice site 559+1G>T	TP53 V216L, TP53 H179Q, TP53 T211I	0.5	different TP53 mutations	2	3
360	GI, non-colorectal	Male	47.3	0	13.7	4.9	-0.03	<= 2mos	TP53 N239fs*25, TP53 S241del	none	NA	only tissue DNA TP53 mutations	5	1
361	Lung	Male	67	1	16.7	11.2	5.39	>2 and <= 6mos	TP53 splice site 782+1G>A	TP53 S127Y, TP53 P27T, TP53 V216M	0.5	different TP53 mutations	3	4
362	Head & neck cancer	Male	48.5	1	39.5	1.9	37.11	>6mos	none	TP53 E271K, TP53 E287K	0.2	only ctDNA TP53 mutations	2	17
363	GI, non-colorectal	Female	66.8	0	31.5	31.1	0.46	<= 2mos	TP53 R213* – subclonal	none	NA	only tissue DNA TP53 mutations	13	1
364	Brain	Female	60.6	1	24.6	1.2	23.09	>6mos	none	none	NA	no TP53 mutation in both	5	1
365	Others / unknown primary	Male	40.3	0	51.5	31	-12.37	>6mos	none	none	NA	no TP53 mutation in both	1	1
366	Brain	Female	22.9	0	58.7	31.1	27.27	>6mos	TP53 E285K, TP53 splice site 719_782+43del107	none	NA	only tissue DNA TP53 mutations	6	1
367	GI, non-colorectal	Female	71.8	1	15.7	5.3	10.23	>6mos	TP53 V143M	none	NA	only tissue DNA TP53 mutations	3	1
368	Head & neck cancer	Male	59.8	0	58.7	0	4.93	>2 and <= 6mos	none	TP53 I332F, TP53 C176S	16.9	only ctDNA TP53 mutations	3	3
369	GI, non-colorectal	Male	41.1	0	1.4	0	1.35	<= 2mos	TP53 G245S	none	NA	only tissue DNA TP53 mutations	2	1
370	Gynecologic	Female	44.4	0	40	0.9	1.09	<= 2mos	TP53 C141Y	TP53 C141Y, TP53 R249G, TP53 R267W	2.5	same + others TP53 mutations	1	3
371	Others / unknown primary	Female	68	0	13.1	2.4	0.89	<= 2mos	none	none	NA	no TP53 mutation in both	4	1
372	Others / unknown primary	Male	61.9	1	60.6	0.3	59.54	>6mos	none	TP53 I195S, TP53 R248Q, TP53 R213*, TP53 S183*	0.2	only ctDNA TP53 mutations	4	11
373	GI, colorectal	Female	63.2	0	43.8	0.2	33.68	>6mos	none	none	NA	no TP53 mutation in both	7	1
374	Lung	Female	54.6	1	72.6	7.8	-0.69	<= 2mos	none	none	NA	no TP53 mutation in both	2	1
375	GI, non-colorectal	Male	53.2	1	18.1	12.7	0.39	<= 2mos	TP53 D228fs*1	none	NA	only tissue DNA TP53 mutations	14	3
376	Others / unknown primary	Female	50.4	0	30.1	0	6.84	>6mos	TP53 R306*	TP53 R306*	1.5	all same TP53 mutations	2	1
377	Lung	Female	48.9	1	54	6.7	-0.49	<= 2mos	none	none	NA	no TP53 mutation in both	6	3
378	Head & neck cancer	Female	34.9	1	17.3	6.6	10.03	>6mos	none	none	NA	no TP53 mutation in both	3	2
379	Others / unknown primary	Male	62.2	0	4.5	0.9	0.36	<= 2mos	none	none	NA	no TP53 mutation in both	3	1
380	Lung	Female	76.8	0	21.8	10.6	-1.28	<= 2mos	TP53 H193Y	TP53 Splice Site SNV, TP53 V143M	0.3	different TP53 mutations	3	2
381	Lung	Female	60.2	1	13.7	8.8	-0.99	<= 2mos	TP53 N239D	none	NA	only tissue DNA TP53 mutations	9	1
382	Hepatopancreatobiliary	Female	62.8	1	31.6	4.5	12.96	>6mos	none	TP53 R333fs, TP53 H179Q	1	only ctDNA TP53 mutations	6	5
383	Head & neck cancer	Male	50.5	0	247.3	13.7	12.53	>6mos	none	none	NA	no TP53 mutation in both	4	1
384	GI, non-colorectal	Male	59.9	0	46	25	0.46	<= 2mos	none	none	NA	no TP53 mutation in both	24	1
385	GI, non-colorectal	Female	28.2	1	10.5	9	1.48	<= 2mos	none	none	NA	no TP53 mutation in both	5	1
386	Lung	Male	73.1	1	8.7	7.8	-2.11	>2 and <= 6mos	TP53 L35fs*9	none	NA	only tissue DNA TP53 mutations	6	2
387	GI, colorectal	Male	60.5	1	12.1	3.8	6.41	>6mos	none	TP53 P278H, TP53 S127P, TP53 L130I, TP53 A138V, TP53 R306*, TP53 R158H, TP53 R158C	1.6	only ctDNA TP53 mutations	31	12
388	Hepatopancreatobiliary	Female	79.8	0	22.2	3.7	13.82	>6mos	none	none	NA	no TP53 mutation in both	3	1
389	Gynecologic	Female	74.7	0	23.3	4.1	0.56	<= 2mos	TP53 R273H	TP53 R273H	12.6	all same TP53 mutations	7	2
390	Head & neck cancer	Male	76.2	0	26	24.8	1.15	<= 2mos	none	none	NA	no TP53 mutation in both	6	1
391	Head & neck cancer	Female	46.8	0	53.2	7.9	13.85	>6mos	none	none	NA	no TP53 mutation in both	2	1
392	Lung	Male	62	0	25.3	0.6	24.41	>6mos	TP53 P152L	TP53 P152L	46.7	all same TP53 mutations	2	3
393	Head & neck cancer	Male	55.4	0	53.4	11.9	38.52	>6mos	none	TP53 P278L, TP53 E204G	0.1	only ctDNA TP53 mutations	3	8
394	Others / unknown primary	Male	66.4	0	49.8	6	3.45	>2 and <= 6mos	TP53 L194R	TP53 L194R, TP53 R248W	25.7	same + others TP53 mutations	5	12
395	Others / unknown primary	Male	87.1	1	3.9	3.3	0.56	<= 2mos	none	none	NA	no TP53 mutation in both	4	1
396	Head & neck cancer	Male	51.4	0	19.2	0	5.95	>2 and <= 6mos	none	none	NA	no TP53 mutation in both	4	6
397	Others / unknown primary	Male	38.1	1	284.6	13.5	4.18	>2 and <= 6mos	TP53 Q144P	TP53 Q144P, TP53 R248W	6.7	same + others TP53 mutations	3	2
398	Head & neck cancer	Female	45.9	0	90	16	0.56	<= 2mos	TP53 E258G, TP53 R156G, TP53 Y220C	none	NA	only tissue DNA TP53 mutations	6	1
399	GI, colorectal	Female	55.9	0	101.8	9.9	79.97	>6mos	TP53 C124*	TP53 C124*	0.6	all same TP53 mutations	3	1
400	GI, colorectal	Male	46.8	0	21.7	11.4	0.82	<= 2mos	none	TP53 C176Y	0.4	only ctDNA TP53 mutations	2	3
401	Lung	Female	72.5	1	2.3	1	0.13	<= 2mos	none	none	NA	no TP53 mutation in both	1	1
402	Hepatopancreatobiliary	Male	60.6	1	4.7	3.5	1.09	<= 2mos	TP53 S90fs*59	none	NA	only tissue DNA TP53 mutations	5	3
403	Lung	Female	79.3	0	9.6	9.2	0.33	<= 2mos	TP53 S90fs*33	TP53 L130R, TP53 R273L, TP53 H179R	0.1	different TP53 mutations	5	4
404	Hepatopancreatobiliary	Female	70.1	1	6.7	5.6	0.99	<= 2mos	TP53 Y163C	TP53 Y163C	18	all same TP53 mutations	3	4
405	GI, non-colorectal	Female	55.8	0	29.4	2.6	-0.36	<= 2mos	TP53 G245S, TP53 Q331R, TP53 R273C	none	NA	only tissue DNA TP53 mutations	14	2
406	GI, non-colorectal	Male	48.4	0	124	17.1	-0.33	<= 2mos	none	none	NA	no TP53 mutation in both	1	1
407	Head & neck cancer	Male	50.2	0	50.6	7.1	15.43	>6mos	none	TP53 Y205D	0.1	only ctDNA TP53 mutations	1	7
408	Hepatopancreatobiliary	Male	76.6	1	68	13.3	54.01	>6mos	none	none	NA	no TP53 mutation in both	4	1
409	GI, colorectal	Female	44.7	1	78.5	9.8	15.89	>6mos	TP53 R110L	TP53 R110L	0.5	all same TP53 mutations	6	2
410	Breast cancer	Female	66.3	0	5.7	0	3.13	>2 and <= 6mos	TP53 G154fs*16, TP53 Y163C	none	NA	only tissue DNA TP53 mutations	3	1
411	GI, colorectal	Male	65.3	1	203.1	0.8	19.31	>6mos	TP53 D49fs*74	none	NA	only tissue DNA TP53 mutations	6	9
412	GI, colorectal	Female	41.4	0	61.8	10.3	1.74	<= 2mos	TP53 E298*	TP53 K120E	0.3	different TP53 mutations	2	1
413	Gynecologic	Female	62.2	0	61.1	7.3	-0.3	<= 2mos	TP53 P278L	TP53 P278L	7	all same TP53 mutations	4	5
414	Lung	Female	88.7	1	4.7	3.7	0.46	<= 2mos	none	none	NA	no TP53 mutation in both	3	1
415	Head & neck cancer	Female	39.2	0	106.3	16.7	0.33	<= 2mos	none	none	NA	no TP53 mutation in both	1	1
416	Head & neck cancer	Male	90.5	1	25.1	0.6	24.64	>6mos	TP53 W53*	TP53 H193R	0.4	different TP53 mutations	11	1
417	Hepatopancreatobiliary	Male	47.7	1	29.5	9.2	-3.75	>2 and <= 6mos	none	none	NA	no TP53 mutation in both	3	1
418	GI, colorectal	Male	73.7	0	137.1	7.2	4.44	>2 and <= 6mos	TP53 R273C	TP53 M246L	0.4	different TP53 mutations	5	1
419	Gynecologic	Female	57	0	52.8	14.8	20.76	>6mos	TP53 S241_N247del	TP53 Exon 7 Deletion	0.3	different TP53 mutations	2	2
420	GI, non-colorectal	Female	38.5	0	76.8	6.5	69.41	>6mos	none	none	NA	no TP53 mutation in both	1	1
421	Head & neck cancer	Male	83.4	0	98.7	13.8	4.84	>2 and <= 6mos	TP53 H193N, TP53 R248W	TP53 H193N, TP53 R248W, TP53 Exon 4 Deletion	2	same + others TP53 mutations	9	8
422	Others / unknown primary	Male	15.8	0	143.1	11.6	-2.96	>2 and <= 6mos	none	none	NA	no TP53 mutation in both	1	1
423	Others / unknown primary	Male	65.2	0	49.3	0	46.18	>6mos	none	none	NA	no TP53 mutation in both	2	1
424	Others / unknown primary	Male	63.6	1	8.5	2.7	5.76	>2 and <= 6mos	TP53 C176S, TP53 Y327*	TP53 C176S, TP53 Y327*	0.8	all same TP53 mutations	7	3
425	Lung	Female	68.1	0	14.5	12.9	1.51	<= 2mos	none	none	NA	no TP53 mutation in both	3	1
426	Lung	Male	72.2	1	67	9.2	25.76	>6mos	none	none	NA	no TP53 mutation in both	3	1
427	Others / unknown primary	Male	42.3	0	11	7.5	3.52	>2 and <= 6mos	none	none	NA	no TP53 mutation in both	3	1
428	Others / unknown primary	Male	75	0	8.1	8.3	-0.13	<= 2mos	none	none	NA	no TP53 mutation in both	4	1
429	GI, non-colorectal	Female	58.7	1	33.2	4	3.45	>2 and <= 6mos	none	TP53 S241F	0.2	only ctDNA TP53 mutations	2	7
430	Lung	Male	71	0	33.2	8.7	-0.69	<= 2mos	TP53 R65*	TP53 R65*	12.8	all same TP53 mutations	4	4
431	Gynecologic	Female	60.8	0	57.6	7.7	19.41	>6mos	TP53 loss	none	NA	only tissue DNA TP53 mutations	4	2
432	Gynecologic	Female	73.4	0	14.8	7.9	-0.43	<= 2mos	TP53 T230A, TP53 V272M	TP53 V272M, TP53 T230A	48.1	all same TP53 mutations	2	7
433	Breast cancer	Female	54.8	1	99	2.3	100.13	>6mos	none	TP53 R110P, TP53 Splice Site SNV	6.6	only ctDNA TP53 mutations	2	11

## Sheet: S.T.3
Supplmentary Table 3. Patient characteristics
Patient characteristics	Total patients
	n = 433
Age at diagnosis (years: median, range)	59 (2–91)
Gender (n, %)
Women	237 (54.7%)
Males	196 (45.3%)
Absolute time between tissue biopsy and blood draw for ctDNA
Median months (range)	5.0 (0.03–241.4)

## Sheet: S.T.4
Supplementary Table 4. TP53 mutations in the studied cohort.
Patients	TP53 mutations in tissue DNA	TP53 mutations in ctDNA	mutations concordance category
1	none	TP53 R248Q	only ctDNA TP53 mutations
2	TP53 D259fs*2, TP53 Y220C	TP53 Y220C	same + others TP53 mutations
3	none	none	no TP53 mutation in both
4	none	none	no TP53 mutation in both
5	TP53 W146fs*2	TP53 H214R	different TP53 mutations
6	none	none	no TP53 mutation in both
7	none	none	no TP53 mutation in both
8	TP53 T125M	TP53 T125M	all same TP53 mutations
9	TP53 C238S	none	only tissue DNA TP53 mutations
10	TP53 H179P	TP53 H179P	all same TP53 mutations
11	none	none	no TP53 mutation in both
12	none	none	no TP53 mutation in both
13	TP53 V203L	TP53 V203L	all same TP53 mutations
14	TP53 R342*	TP53 R342*	all same TP53 mutations
15	TP53 G245S	none	only tissue DNA TP53 mutations
16	none	none	no TP53 mutation in both
17	TP53 E224*	TP53 E224*	all same TP53 mutations
18	TP53 N288fs*15	TP53 D281V, TP53 P151H	different TP53 mutations
19	TP53 V143M	TP53 V143M	all same TP53 mutations
20	none	TP53 R196Q	only ctDNA TP53 mutations
21	TP53 R282W	none	only tissue DNA TP53 mutations
22	TP53 splice site 993+2T>A	TP53 P98A	different TP53 mutations
23	none	none	no TP53 mutation in both
24	none	none	no TP53 mutation in both
25	TP53 splice site 993+1G>A	none	only tissue DNA TP53 mutations
26	TP53 R248W	none	only tissue DNA TP53 mutations
27	none	none	no TP53 mutation in both
28	none	none	no TP53 mutation in both
29	none	none	no TP53 mutation in both
30	none	none	no TP53 mutation in both
31	TP53 R248Q	TP53 R248Q	all same TP53 mutations
32	none	none	no TP53 mutation in both
33	none	none	no TP53 mutation in both
34	TP53 A138V	none	only tissue DNA TP53 mutations
35	none	none	no TP53 mutation in both
36	TP53 H168R	none	only tissue DNA TP53 mutations
37	TP53 R342*	TP53 R342*	all same TP53 mutations
38	TP53 G245V	TP53 R248W	different TP53 mutations
39	none	none	no TP53 mutation in both
40	none	none	no TP53 mutation in both
41	none	none	no TP53 mutation in both
42	TP53 R248Q	none	only tissue DNA TP53 mutations
43	TP53 S166*	TP53 S166*, TP53 V147G	same + others TP53 mutations
44	TP53 D281E	none	only tissue DNA TP53 mutations
45	TP53 R306*	none	only tissue DNA TP53 mutations
46	TP53 Y163C	TP53 Y163C	all same TP53 mutations
47	none	none	no TP53 mutation in both
48	none	none	no TP53 mutation in both
49	none	TP53 R273H	only ctDNA TP53 mutations
50	TP53 R273C	TP53 R273C	all same TP53 mutations
51	TP53 P278L	none	only tissue DNA TP53 mutations
52	none	none	no TP53 mutation in both
53	none	none	no TP53 mutation in both
54	none	none	no TP53 mutation in both
55	none	none	no TP53 mutation in both
56	none	TP53 R342*, TP53 C275Y	only ctDNA TP53 mutations
57	TP53 R158H	none	only tissue DNA TP53 mutations
58	TP53 C275F	TP53 C275F	all same TP53 mutations
59	none	none	no TP53 mutation in both
60	none	none	no TP53 mutation in both
61	none	none	no TP53 mutation in both
62	TP53 Q331H, TP53 splice site 994-1G>C	none	only tissue DNA TP53 mutations
63	TP53 E204*	TP53 C238Y	different TP53 mutations
64	none	none	no TP53 mutation in both
65	none	none	no TP53 mutation in both
66	TP53 H179R	TP53 R248Q, TP53 I195T	different TP53 mutations
67	TP53 H179R	none	only tissue DNA TP53 mutations
68	none	TP53 M237I	only ctDNA TP53 mutations
69	TP53 K132R	none	only tissue DNA TP53 mutations
70	TP53 R273H	TP53 R273H	all same TP53 mutations
71	none	TP53 G244S	only ctDNA TP53 mutations
72	none	none	no TP53 mutation in both
73	TP53 S149fs*32	TP53 P177H	different TP53 mutations
74	TP53 truncation exon 10	none	only tissue DNA TP53 mutations
75	TP53 P152fs*14	TP53 S127F, TP53 Y220C, TP53 V173M	different TP53 mutations
76	TP53 R282W	none	only tissue DNA TP53 mutations
77	TP53 R248W	TP53 R248W	all same TP53 mutations
78	none	none	no TP53 mutation in both
79	none	none	no TP53 mutation in both
80	none	none	no TP53 mutation in both
81	TP53 splice site 97-1G>T	none	only tissue DNA TP53 mutations
82	none	none	no TP53 mutation in both
83	TP53 G245R, TP53 M246V	TP53 V216M	different TP53 mutations
84	none	none	no TP53 mutation in both
85	TP53 V272L	none	only tissue DNA TP53 mutations
86	TP53 R158H	TP53 Y220C, TP53 P152L	different TP53 mutations
87	none	none	no TP53 mutation in both
88	TP53 R248Q	none	only tissue DNA TP53 mutations
89	none	none	no TP53 mutation in both
90	TP53 C275S	TP53 C275S	all same TP53 mutations
91	none	none	no TP53 mutation in both
92	none	TP53 R213Q	only ctDNA TP53 mutations
93	none	none	no TP53 mutation in both
94	none	none	no TP53 mutation in both
95	none	none	no TP53 mutation in both
96	none	none	no TP53 mutation in both
97	TP53 F134V	TP53 F134V	all same TP53 mutations
98	none	none	no TP53 mutation in both
99	TP53 K132R	TP53 K132R	all same TP53 mutations
100	none	none	no TP53 mutation in both
101	none	none	no TP53 mutation in both
102	none	none	no TP53 mutation in both
103	TP53 E286G	TP53 E286G	all same TP53 mutations
104	TP53 R248Q	TP53 R248Q	all same TP53 mutations
105	TP53 Q144*	TP53 Q144*	all same TP53 mutations
106	none	none	no TP53 mutation in both
107	none	TP53 Y163C	only ctDNA TP53 mutations
108	none	none	no TP53 mutation in both
109	TP53 R248W	TP53 R248W, TP53 R273H	same + others TP53 mutations
110	TP53 W91*	none	only tissue DNA TP53 mutations
111	TP53 R282W	none	only tissue DNA TP53 mutations
112	none	none	no TP53 mutation in both
113	none	none	no TP53 mutation in both
114	TP53 P278S	none	only tissue DNA TP53 mutations
115	TP53 R282W	TP53 R282W	all same TP53 mutations
116	none	TP53 P177H	only ctDNA TP53 mutations
117	TP53 R306*	TP53 R306*	all same TP53 mutations
118	TP53 S94*	TP53 S94*	all same TP53 mutations
119	TP53 V157F	TP53 V157F, TP53 Y220H	same + others TP53 mutations
120	TP53 C135Y	TP53 C135Y	all same TP53 mutations
121	TP53 H179R	none	only tissue DNA TP53 mutations
122	TP53 E349*	TP53 V216M	different TP53 mutations
123	TP53 Y220C	TP53 Y220C, TP53 R282W	same + others TP53 mutations
124	none	TP53 C275Y	only ctDNA TP53 mutations
125	none	TP53 V272M	only ctDNA TP53 mutations
126	none	none	no TP53 mutation in both
127	none	none	no TP53 mutation in both
128	none	TP53 L265P	only ctDNA TP53 mutations
129	none	TP53 Y220C	only ctDNA TP53 mutations
130	TP53 R248W	none	only tissue DNA TP53 mutations
131	TP53 P390fs*5+, TP53 rearrangement exon 4	none	only tissue DNA TP53 mutations
132	TP53 Q100*	TP53 Q100*, TP53 V173M, TP53 V216M	same + others TP53 mutations
133	none	TP53 D281E	only ctDNA TP53 mutations
134	TP53 splice site 375+1G>T	none	only tissue DNA TP53 mutations
135	none	TP53 R249W	only ctDNA TP53 mutations
136	TP53 S90fs*33	none	only tissue DNA TP53 mutations
137	none	none	no TP53 mutation in both
138	none	none	no TP53 mutation in both
139	TP53 R248W	none	only tissue DNA TP53 mutations
140	TP53 I255S	TP53 K132E	different TP53 mutations
141	TP53 R282W	TP53 R282W	all same TP53 mutations
142	none	none	no TP53 mutation in both
143	TP53 R267P	TP53 R267P, TP53 R267W	same + others TP53 mutations
144	TP53 R248Q	TP53 R248Q	all same TP53 mutations
145	none	none	no TP53 mutation in both
146	none	none	no TP53 mutation in both
147	TP53 R158H	none	only tissue DNA TP53 mutations
148	none	TP53 R175H	only ctDNA TP53 mutations
149	none	none	no TP53 mutation in both
150	none	none	no TP53 mutation in both
151	none	none	no TP53 mutation in both
152	none	none	no TP53 mutation in both
153	TP53 R196fs*52	TP53 Exon 6 Insertion, TP53 L194H	different TP53 mutations
154	TP53 loss exons 10-11	none	only tissue DNA TP53 mutations
155	none	TP53 R175H	only ctDNA TP53 mutations
156	none	none	no TP53 mutation in both
157	none	none	no TP53 mutation in both
158	TP53 E285K	TP53 E285K	all same TP53 mutations
159	none	none	no TP53 mutation in both
160	none	none	no TP53 mutation in both
161	TP53 Q167*	TP53 Q167*	all same TP53 mutations
162	TP53 Q104*	TP53 Q104*	all same TP53 mutations
163	none	none	no TP53 mutation in both
164	TP53 Y205C	TP53 P190T	different TP53 mutations
165	TP53 H179L	none	only tissue DNA TP53 mutations
166	TP53 I195T, TP53 S215T	none	only tissue DNA TP53 mutations
167	TP53 splice site 993+2T>C	none	only tissue DNA TP53 mutations
168	none	TP53 E285K, TP53 E221K	only ctDNA TP53 mutations
169	TP53 S127Y	none	only tissue DNA TP53 mutations
170	none	none	no TP53 mutation in both
171	none	TP53 H178P, TP53 R273C	only ctDNA TP53 mutations
172	none	none	no TP53 mutation in both
173	TP53 G266E	none	only tissue DNA TP53 mutations
174	TP53 P278S, TP53 R249T	TP53 Y163C	different TP53 mutations
175	none	TP53 I254T	only ctDNA TP53 mutations
176	none	TP53 R248W, TP53 H179Y	only ctDNA TP53 mutations
177	TP53 R175H	TP53 R175H	all same TP53 mutations
178	none	TP53 I195T	only ctDNA TP53 mutations
179	none	none	no TP53 mutation in both
180	TP53 G302fs*4	none	only tissue DNA TP53 mutations
181	TP53 W53*	none	only tissue DNA TP53 mutations
182	TP53 loss exons 2-4, TP53 V157F	TP53 V157F, TP53 R337C	same + others TP53 mutations
183	none	none	no TP53 mutation in both
184	TP53 R273C	TP53 R273C	all same TP53 mutations
185	TP53 M246V	none	only tissue DNA TP53 mutations
186	none	TP53 F270L	only ctDNA TP53 mutations
187	none	none	no TP53 mutation in both
188	TP53 G245S	TP53 G245S	all same TP53 mutations
189	none	none	no TP53 mutation in both
190	TP53 P250L, TP53 V218fs*29	none	only tissue DNA TP53 mutations
191	TP53 splice site 783-2A>G	none	only tissue DNA TP53 mutations
192	none	none	no TP53 mutation in both
193	TP53 R175H	TP53 R175H, TP53 A161T, TP53 H168R	same + others TP53 mutations
194	none	TP53 V197M	only ctDNA TP53 mutations
195	none	none	no TP53 mutation in both
196	none	none	no TP53 mutation in both
197	TP53 L204fs*7, TP53 splice site 376-8_376delTCCTACAGT	none	only tissue DNA TP53 mutations
198	none	none	no TP53 mutation in both
199	none	none	no TP53 mutation in both
200	TP53 splice site 75-23_77del26	none	only tissue DNA TP53 mutations
201	TP53 R175H	TP53 R175H	all same TP53 mutations
202	TP53 splice site 993+1G>A	none	only tissue DNA TP53 mutations
203	none	none	no TP53 mutation in both
204	none	none	no TP53 mutation in both
205	TP53 G245S	none	only tissue DNA TP53 mutations
206	none	none	no TP53 mutation in both
207	none	none	no TP53 mutation in both
208	none	none	no TP53 mutation in both
209	TP53 E285K	TP53 E285K	all same TP53 mutations
210	TP53 R273L	none	only tissue DNA TP53 mutations
211	none	none	no TP53 mutation in both
212	none	none	no TP53 mutation in both
213	none	none	no TP53 mutation in both
214	TP53 R280S	none	only tissue DNA TP53 mutations
215	none	none	no TP53 mutation in both
216	TP53 Y126C	TP53 Y126C, TP53 H178P	same + others TP53 mutations
217	none	none	no TP53 mutation in both
218	none	none	no TP53 mutation in both
219	TP53 R248Q	TP53 R248Q	all same TP53 mutations
220	TP53 D281E	none	only tissue DNA TP53 mutations
221	TP53 K305fs*40	none	only tissue DNA TP53 mutations
222	none	none	no TP53 mutation in both
223	TP53 I255del	none	only tissue DNA TP53 mutations
224	none	none	no TP53 mutation in both
225	TP53 V272G	TP53 V272G	all same TP53 mutations
226	none	none	no TP53 mutation in both
227	TP53 R213*	TP53 R213*	all same TP53 mutations
228	none	none	no TP53 mutation in both
229	TP53 D207fs*6	none	only tissue DNA TP53 mutations
230	none	none	no TP53 mutation in both
231	none	none	no TP53 mutation in both
232	TP53 splice site 376-1G>C	none	only tissue DNA TP53 mutations
233	TP53 G245S	TP53 G245S	all same TP53 mutations
234	none	none	no TP53 mutation in both
235	TP53 P142fs*28, TP53 S241A	TP53 V143M	different TP53 mutations
236	TP53 R273H	TP53 Y236D	different TP53 mutations
237	TP53 G266R	TP53 G266R	all same TP53 mutations
238	TP53 splice site 993+1G>A	none	only tissue DNA TP53 mutations
239	none	none	no TP53 mutation in both
240	TP53 Y163C	TP53 Y163C, TP53 Q317K	same + others TP53 mutations
241	TP53 S241T	none	only tissue DNA TP53 mutations
242	none	TP53 S241F	only ctDNA TP53 mutations
243	none	none	no TP53 mutation in both
244	TP53 H168R	TP53 H168R	all same TP53 mutations
245	TP53 C242G	TP53 C242G	all same TP53 mutations
246	TP53 R282W	none	only tissue DNA TP53 mutations
247	TP53 C238_N239>*VGSDCTTIHYNYMC	none	only tissue DNA TP53 mutations
248	TP53 G266E	TP53 G266E	all same TP53 mutations
249	none	none	no TP53 mutation in both
250	none	none	no TP53 mutation in both
251	TP53 E258K	TP53 E258K	all same TP53 mutations
252	none	none	no TP53 mutation in both
253	TP53 R282W	none	only tissue DNA TP53 mutations
254	TP53 V272L	TP53 V272L	all same TP53 mutations
255	TP53 R209fs*6	none	only tissue DNA TP53 mutations
256	none	none	no TP53 mutation in both
257	none	TP53 P190S	only ctDNA TP53 mutations
258	none	none	no TP53 mutation in both
259	TP53 R181C	TP53 R181C	all same TP53 mutations
260	TP53 H179R, TP53 R196*	none	only tissue DNA TP53 mutations
261	none	none	no TP53 mutation in both
262	TP53 I254del	none	only tissue DNA TP53 mutations
263	TP53 splice site 96+1G>A	none	only tissue DNA TP53 mutations
264	none	none	no TP53 mutation in both
265	TP53 splice site 920-2A>G	none	only tissue DNA TP53 mutations
266	TP53 R282W	none	only tissue DNA TP53 mutations
267	none	none	no TP53 mutation in both
268	none	none	no TP53 mutation in both
269	TP53 R213L	TP53 R213L	all same TP53 mutations
270	none	none	no TP53 mutation in both
271	none	none	no TP53 mutation in both
272	none	TP53 Y234C	only ctDNA TP53 mutations
273	TP53 F134C	TP53 F134C	all same TP53 mutations
274	none	none	no TP53 mutation in both
275	TP53 R273C	none	only tissue DNA TP53 mutations
276	TP53 G245S	TP53 G245S	all same TP53 mutations
277	TP53 V173M	TP53 V173M	all same TP53 mutations
278	none	none	no TP53 mutation in both
279	none	none	no TP53 mutation in both
280	none	none	no TP53 mutation in both
281	none	none	no TP53 mutation in both
282	none	none	no TP53 mutation in both
283	TP53 S241F	none	only tissue DNA TP53 mutations
284	none	none	no TP53 mutation in both
285	TP53 M246V	TP53 M246V	all same TP53 mutations
286	TP53 P278T	TP53 P278T	all same TP53 mutations
287	TP53 R175H	none	only tissue DNA TP53 mutations
288	none	TP53 Y205C	only ctDNA TP53 mutations
289	none	none	no TP53 mutation in both
290	TP53 S46fs*74	none	only tissue DNA TP53 mutations
291	TP53 G245R	none	only tissue DNA TP53 mutations
292	none	none	no TP53 mutation in both
293	TP53 V172F	TP53 V172F	all same TP53 mutations
294	none	none	no TP53 mutation in both
295	TP53 P190fs*57, TP53 P190L, TP53 P191S	none	only tissue DNA TP53 mutations
296	TP53 E286K, TP53 T125M	none	only tissue DNA TP53 mutations
297	TP53 Y205H	none	only tissue DNA TP53 mutations
298	TP53 H179Q	TP53 H179Q	all same TP53 mutations
299	none	none	no TP53 mutation in both
300	TP53 Y205C	TP53 Y205C	all same TP53 mutations
301	TP53 Y107*	TP53 Y107*	all same TP53 mutations
302	TP53 G244A	none	only tissue DNA TP53 mutations
303	TP53 C238Y, TP53 E287fs*58	none	only tissue DNA TP53 mutations
304	TP53 splice site 920-6_922delTCCTAGCAC	none	only tissue DNA TP53 mutations
305	none	TP53 M237T, TP53 L257R, TP53 G245C, TP53 K139N, TP53 V216M, TP53 R273C	only ctDNA TP53 mutations
306	TP53 R213*	TP53 R213*	all same TP53 mutations
307	TP53 splice site 993+1G>A	TP53 V172F	different TP53 mutations
308	TP53 R158H	none	only tissue DNA TP53 mutations
309	none	none	no TP53 mutation in both
310	TP53 M237I	none	only tissue DNA TP53 mutations
311	none	TP53 V173L, TP53 Splice Site SNV	only ctDNA TP53 mutations
312	TP53 C242F, TP53 R175H	none	only tissue DNA TP53 mutations
313	none	none	no TP53 mutation in both
314	TP53 Y205D	none	only tissue DNA TP53 mutations
315	none	none	no TP53 mutation in both
316	none	none	no TP53 mutation in both
317	none	none	no TP53 mutation in both
318	none	none	no TP53 mutation in both
319	TP53 V216M	TP53 V216M	all same TP53 mutations
320	none	none	no TP53 mutation in both
321	TP53 W53*	none	only tissue DNA TP53 mutations
322	none	none	no TP53 mutation in both
323	none	none	no TP53 mutation in both
324	TP53 P152fs*18, TP53 R158H	TP53 R158H	same + others TP53 mutations
325	none	none	no TP53 mutation in both
326	TP53 M237I	none	only tissue DNA TP53 mutations
327	TP53 R282W	TP53 M246V, TP53 R282W	same + others TP53 mutations
328	none	none	no TP53 mutation in both
329	TP53 P152L	TP53 P152L	all same TP53 mutations
330	none	none	no TP53 mutation in both
331	TP53 splice site 919+1G>A	none	only tissue DNA TP53 mutations
332	none	none	no TP53 mutation in both
333	none	none	no TP53 mutation in both
334	none	TP53 H168P, TP53 S127F	only ctDNA TP53 mutations
335	TP53 H168R	TP53 H168R	all same TP53 mutations
336	none	none	no TP53 mutation in both
337	TP53 E271V, TP53 V274D	TP53 C176F, TP53 V274D, TP53 R175C, TP53 E271V	same + others TP53 mutations
338	none	none	no TP53 mutation in both
339	none	none	no TP53 mutation in both
340	none	none	no TP53 mutation in both
341	TP53 E298*	TP53 E298*	all same TP53 mutations
342	TP53 T140fs*28	none	only tissue DNA TP53 mutations
343	none	none	no TP53 mutation in both
344	none	none	no TP53 mutation in both
345	none	none	no TP53 mutation in both
346	none	none	no TP53 mutation in both
347	TP53 S127F	TP53 S127F	all same TP53 mutations
348	none	none	no TP53 mutation in both
349	TP53 P223fs*24	TP53 P223L	different TP53 mutations
350	TP53 F134L	TP53 F134L	all same TP53 mutations
351	none	none	no TP53 mutation in both
352	none	none	no TP53 mutation in both
353	TP53 R273C – subclonal	none	only tissue DNA TP53 mutations
354	TP53 G245S	none	only tissue DNA TP53 mutations
355	TP53 R65*	none	only tissue DNA TP53 mutations
356	none	TP53 S215R	only ctDNA TP53 mutations
357	none	TP53 E171K	only ctDNA TP53 mutations
358	none	none	no TP53 mutation in both
359	TP53 splice site 559+1G>T	TP53 V216L, TP53 H179Q, TP53 T211I	different TP53 mutations
360	TP53 N239fs*25, TP53 S241del	none	only tissue DNA TP53 mutations
361	TP53 splice site 782+1G>A	TP53 S127Y, TP53 P27T, TP53 V216M	different TP53 mutations
362	none	TP53 E271K, TP53 E287K	only ctDNA TP53 mutations
363	TP53 R213* – subclonal	none	only tissue DNA TP53 mutations
364	none	none	no TP53 mutation in both
365	none	none	no TP53 mutation in both
366	TP53 E285K, TP53 splice site 719_782+43del107	none	only tissue DNA TP53 mutations
367	TP53 V143M	none	only tissue DNA TP53 mutations
368	none	TP53 I332F, TP53 C176S	only ctDNA TP53 mutations
369	TP53 G245S	none	only tissue DNA TP53 mutations
370	TP53 C141Y	TP53 C141Y, TP53 R249G, TP53 R267W	same + others TP53 mutations
371	none	none	no TP53 mutation in both
372	none	TP53 I195S, TP53 R248Q, TP53 R213*, TP53 S183*	only ctDNA TP53 mutations
373	none	none	no TP53 mutation in both
374	none	none	no TP53 mutation in both
375	TP53 D228fs*1	none	only tissue DNA TP53 mutations
376	TP53 R306*	TP53 R306*	all same TP53 mutations
377	none	none	no TP53 mutation in both
378	none	none	no TP53 mutation in both
379	none	none	no TP53 mutation in both
380	TP53 H193Y	TP53 Splice Site SNV, TP53 V143M	different TP53 mutations
381	TP53 N239D	none	only tissue DNA TP53 mutations
382	none	TP53 R333fs, TP53 H179Q	only ctDNA TP53 mutations
383	none	none	no TP53 mutation in both
384	none	none	no TP53 mutation in both
385	none	none	no TP53 mutation in both
386	TP53 L35fs*9	none	only tissue DNA TP53 mutations
387	none	TP53 P278H, TP53 S127P, TP53 L130I, TP53 A138V, TP53 R306*, TP53 R158H, TP53 R158C	only ctDNA TP53 mutations
388	none	none	no TP53 mutation in both
389	TP53 R273H	TP53 R273H	all same TP53 mutations
390	none	none	no TP53 mutation in both
391	none	none	no TP53 mutation in both
392	TP53 P152L	TP53 P152L	all same TP53 mutations
393	none	TP53 P278L, TP53 E204G	only ctDNA TP53 mutations
394	TP53 L194R	TP53 L194R, TP53 R248W	same + others TP53 mutations
395	none	none	no TP53 mutation in both
396	none	none	no TP53 mutation in both
397	TP53 Q144P	TP53 Q144P, TP53 R248W	same + others TP53 mutations
398	TP53 E258G, TP53 R156G, TP53 Y220C	none	only tissue DNA TP53 mutations
399	TP53 C124*	TP53 C124*	all same TP53 mutations
400	none	TP53 C176Y	only ctDNA TP53 mutations
401	none	none	no TP53 mutation in both
402	TP53 S90fs*59	none	only tissue DNA TP53 mutations
403	TP53 S90fs*33	TP53 L130R, TP53 R273L, TP53 H179R	different TP53 mutations
404	TP53 Y163C	TP53 Y163C	all same TP53 mutations
405	TP53 G245S, TP53 Q331R, TP53 R273C	none	only tissue DNA TP53 mutations
406	none	none	no TP53 mutation in both
407	none	TP53 Y205D	only ctDNA TP53 mutations
408	none	none	no TP53 mutation in both
409	TP53 R110L	TP53 R110L	all same TP53 mutations
410	TP53 G154fs*16, TP53 Y163C	none	only tissue DNA TP53 mutations
411	TP53 D49fs*74	none	only tissue DNA TP53 mutations
412	TP53 E298*	TP53 K120E	different TP53 mutations
413	TP53 P278L	TP53 P278L	all same TP53 mutations
414	none	none	no TP53 mutation in both
415	none	none	no TP53 mutation in both
416	TP53 W53*	TP53 H193R	different TP53 mutations
417	none	none	no TP53 mutation in both
418	TP53 R273C	TP53 M246L	different TP53 mutations
419	TP53 S241_N247del	TP53 Exon 7 Deletion	different TP53 mutations
420	none	none	no TP53 mutation in both
421	TP53 H193N, TP53 R248W	TP53 H193N, TP53 R248W, TP53 Exon 4 Deletion	same + others TP53 mutations
422	none	none	no TP53 mutation in both
423	none	none	no TP53 mutation in both
424	TP53 C176S, TP53 Y327*	TP53 C176S, TP53 Y327*	all same TP53 mutations
425	none	none	no TP53 mutation in both
426	none	none	no TP53 mutation in both
427	none	none	no TP53 mutation in both
428	none	none	no TP53 mutation in both
429	none	TP53 S241F	only ctDNA TP53 mutations
430	TP53 R65*	TP53 R65*	all same TP53 mutations
431	TP53 loss	none	only tissue DNA TP53 mutations
432	TP53 T230A, TP53 V272M	TP53 V272M, TP53 T230A	all same TP53 mutations
433	none	TP53 R110P, TP53 Splice Site SNV	only ctDNA TP53 mutations

## Sheet: S.T.5
Supplamentary Table 5. Chi square test residuals for mutation concordance category vs. mutations type test
Table
	frameshift variant	inframe deletion	missense variant	other	splice site	stop gain
all same TP53 mutations	0	0	56	0	1	16
only ctDNA TP53 mutations	1	0	61	2	0	4
only tissue DNA TP53 mutations	18	7	65	5	15	7
Residuals
	frameshift variant	inframe deletion	missense variant	other	splice site	stop gain
all same TP53 mutations	-2.31861	-1.40735	0.627623	-1.40735	-1.65772	3.0248
only ctDNA TP53 mutations	-1.79093	-1.35829	1.88147	0.114142	-2.05355	-1.16818
only tissue DNA TP53 mutations	3.1968	2.14716	-1.93012	1.02463	2.87497	-1.49869

## Sheet: S.T.6
Supplamentary Table 6. Table and Chi square test residuals for mutation concordance category vs. time interval between tests
Table
	<= 2mos	>2 and <= 6mos	>6mos
all same TP53 mutations	34	11	26
different TP53 mutations	9	4	14
no TP53 mutation in both	60	28	87
only ctDNA TP53 mutations	9	6	28
only tissue DNA TP53 mutations	43	15	41
same + others TP53 mutations	10	5	3
Residuals
	<= 2mos	>2 and <= 6mos	>6mos
all same TP53 mutations	1.33511	-0.0933773	-1.16074
different TP53 mutations	-0.40176	-0.145855	0.451717
no TP53 mutation in both	-0.818736	0.0214293	0.732901
only ctDNA TP53 mutations	-1.82456	-0.325554	1.8531
only tissue DNA TP53 mutations	0.858801	-0.195368	-0.666962
same + others TP53 mutations	1.19927	1.25863	-1.83315

## Sheet: S.T.7
Supplementary Table 7. Wilcoxon pairwise difference of time interval between tests between mutations concordance categories (FDR correction). The significant pairs are highlighted in bold.
	all same TP53 mutations	different TP53 mutations	no TP53 mutation in both	only ctDNA TP53 mutations	only tissue DNA TP53 mutations
different TP53 mutations	0.378233	NA	NA	NA	NA
no TP53 mutation in both	0.0656508	0.952052	NA	NA	NA
only ctDNA TP53 mutations	0.0365196	0.498157	0.489463	NA	NA
only tissue DNA TP53 mutations	0.498157	0.51916	0.365312	0.0656508	NA
same + others TP53 mutations	0.749327	0.498157	0.378233	0.041342	0.838651

## Sheet: S.T.8
Supplementary Table 8. Table and Chi square test residulars of mutation concordance category vs. cancer type
Table
	Brain	Breast cancer	GI, colorectal	GI, non-colorectal	Gynecologic	Head & neck cancer	Hepatopancreatobiliary	Lung	Others / unknown primary
all same TP53 mutations	0	9	21	8	4	3	6	17	3
different TP53 mutations	4	2	4	0	4	2	4	5	2
no TP53 mutation in both	31	21	8	21	5	10	15	30	34
only ctDNA TP53 mutations	4	8	4	4	3	5	4	4	7
only tissue DNA TP53 mutations	17	9	14	16	4	6	11	19	3
same + others TP53 mutations	0	1	3	1	2	5	0	3	3
Residuals
	Brain	Breast cancer	GI, colorectal	GI, non-colorectal	Gynecologic	Head & neck cancer	Hepatopancreatobiliary	Lung	Others / unknown primary
all same TP53 mutations	-3.03026	0.27988	4.08163	-0.069365	0.206711	-0.923959	-0.218229	1.17724	-1.89264
different TP53 mutations	0.271896	-0.633045	0.344848	-1.76572	2.24391	0.0481716	0.953436	0.0617844	-0.690009
no TP53 mutation in both	1.75878	0.176216	-2.95922	0.176216	-1.30505	-0.714447	-0.290067	-0.271477	2.83221
only ctDNA TP53 mutations	-0.662025	1.36186	-0.588406	-0.433225	0.55155	1.09513	0.0139051	-1.34594	0.807955
only tissue DNA TP53 mutations	1.17273	-0.719253	0.470603	1.35108	-0.459264	-0.408581	0.613231	0.276174	-2.57801
same + others TP53 mutations	-1.52576	-0.748086	0.504047	-0.748086	1.13503	3.2693	-1.2895	-0.134667	0.570197
